1 **DNA breaks are key contributors to the cost of antibiotic resistance**

2

3 Roberto Balbontín<sup>#1</sup> and Isabel Gordo<sup>#1</sup>

5 <sup>1</sup> Instituto Gulbenkian de Ciência, Oeiras, Portugal

6

7 <sup>#</sup>For correspondence:

8 E-mail: [rbalbontin@igc.gulbenkian.pt](mailto:rbalbontin@igc.gulbenkian.pt) and [igordo@igc.gulbenkian.pt](mailto:igordo@igc.gulbenkian.pt)

9

10

11

12

13

14

15

16

17

18

19

20

21

22 **ABSTRACT**

23

24 **Bacteria can become resistant to antibiotics by acquiring mutations in genes encoding the**  
25 **physiologically relevant proteins targeted by the drugs. Consequently, resistance mutations can**  
26 **cause growth defects (fitness cost) in the absence of antibiotics<sup>1</sup>. The cost thus, can hinder**  
27 **maintenance and dissemination of resistances, by enabling sensitive bacteria to outcompete**  
28 **resistant clones upon reducing the amount of antibiotics<sup>2</sup>. Besides its paramount importance, the**  
29 **causes of the cost of resistance are poorly understood<sup>3</sup>. Here we show that DNA breaks explain**  
30 **73% of the variation in the cost caused by resistance mutations affecting transcription,**  
31 **translation, and their coupling, in *Escherichia coli*. We also reveal that the RNase HI, responsible**  
32 **for the specific degradation of R-loops<sup>4</sup>, is a key determinant of resistance costs and thus a novel**  
33 **target for antimicrobials specific against resistant bacteria, which we validated using a**  
34 **repurposed drug<sup>5</sup>. Accordingly, we show that lack of RNase HI rapidly drives resistant clones to**  
35 **extinction in polymorphic populations with high resistance levels. These results reveal a key**  
36 **cause of the cost of resistance, and provide a conceptual framework for the development of novel**  
37 **strategies to lower the alarming levels of resistance currently observed in the human microbiome.**

38

39

40

41

42 Antibiotic resistance (AR) entails a large human and economic burden worldwide<sup>6</sup>. The  
43 maintenance and dissemination of AR in bacterial populations depend on the rate at which resistances  
44 are acquired and on their effects on bacterial fitness (cost). The cost of AR is influenced by the  
45 environment, by interactions between the resistances and their genetic background (epistasis), and by  
46 the subsequent acquisition of mutations compensating for fitness defects (compensatory evolution)<sup>2</sup>.  
47 Despite its importance, the causes of the cost of AR are not completely understood<sup>3</sup>. Identifying those  
48 causes has become, thus, the Holy Grail in the AR field.

49

50 Resistance mutations often map to genes encoding the proteins targeted by the antibiotics.  
51 These target proteins are typically involved in essential functions, such as transcription, translation,  
52 DNA replication, or cell wall biosynthesis. Resistance mutations cause alterations in the structure of the  
53 target protein, rendering it insensitive to the drug, but often affecting its function as well<sup>1,2</sup>.

54

55 Rifampicin and streptomycin resistance mutations (Rif<sup>R</sup> and Str<sup>R</sup>) paradigmatically represent  
56 resistances to antibiotics targeting transcription and translation, respectively, and have been extensively  
57 studied in *Escherichia coli*. Rif<sup>R</sup> mutants often show cost<sup>7</sup>, commonly associated with alterations in the  
58 rates of transcription initiation, elongation, slippage, and termination<sup>8</sup>. Most Str<sup>R</sup> mutations also cause a  
59 cost<sup>9</sup>, generally linked to increased translation fidelity and reduced processivity<sup>9</sup>.

60

61 Thus, the costs of Rif<sup>R</sup> and Str<sup>R</sup> mutations are commonly attributed to defects in protein  
62 synthesis, either globally<sup>10</sup>, or circumscribed to specific functions or regulons<sup>11, 12, 13</sup>. We recently

63 showed that compensation for the cost of double resistance (Rif<sup>R</sup> Str<sup>R</sup>) can occur via overexpression of  
64 *nusG* and *nusE*<sup>14</sup>, which encode the proteins that physically connect the RNA polymerase (RNAP) and  
65 the ribosome<sup>15</sup>. This suggests that compensation hinges on reinforcing the coupling between  
66 transcription and translation and, consequently, that Rif<sup>R</sup> and Str<sup>R</sup> mutations disturb this coordination.  
67 Both NusG and coupling between transcription and translation prevent spontaneous RNAP  
68 backtracking<sup>16, 17</sup>, which can cause double-strand DNA breaks (DSBs)<sup>18</sup>. This led us to hypothesize that  
69 perturbation of transcription-translation coupling caused by Rif<sup>R</sup> and Str<sup>R</sup> mutations generate DSBs,  
70 which contribute to their cost.

71

72 In order to test this hypothesis, we simultaneously measured competitive fitness and activation  
73 of the SOS response – a well-known proxy for the occurrence of DSBs<sup>19</sup> – in sensitive *E. coli*,  
74 streptomycin resistant strains (RpsL<sup>K43N</sup>, RpsL<sup>K43T</sup>, and RpsL<sup>K43R</sup>), rifampicin resistant strains  
75 (RpoB<sup>H526L</sup>, RpoB<sup>H526Y</sup>, and RpoB<sup>S531F</sup>), and double resistant mutants harbouring the nine possible  
76 combinations of these resistance alleles. Interestingly, 14 out of the 15 resistant strains show increased  
77 SOS activation ([Figure 1A](#)), which strongly correlates with the cost of resistance, explaining 73% of its  
78 variation ([Figure 1B](#)). Thus DSBs can contribute to the cost of AR. To independently confirm the  
79 occurrence of DSBs in resistant bacteria, we used a system which permits direct visualization of  
80 double-stranded DNA ends<sup>20</sup>, combined with the SOS reporter. This allowed us to confirm that resistant  
81 mutants indeed show increased DSBs ([Extended Data Figure 1](#), [Extended Data Table 1](#)).

82

83 Erythromycin targets the 50S ribosomal subunit, affecting translation and its coupling with  
84 transcription<sup>21</sup>. Erythromycin resistance mutations (Erm<sup>R</sup>) mapping in the genes *rplD* and *rplV*  
85 (encoding L4 and L22, respectively) are known to reduce translation elongation rate<sup>22</sup>, credibly  
86 affecting transcription-translation coupling as well. We isolated Erm<sup>R</sup> clones carrying two of these  
87 mutations, RplD<sup>G66R</sup> and RplV<sup>Δ82-84</sup>, and found that both mutants show increased SOS (Figure 1C),  
88 demonstrating that mechanistically different perturbations of transcription-translation coupling cause  
89 DSBs as well.

90

91 We then reasoned that, if DSBs are a major driver of the cost of resistance, the process of  
92 compensatory evolution should lead to lower DSBs. To query if this happens, we first measured the  
93 cost and SOS induction in the RpsL<sup>K43T</sup> RpoB<sup>H526Y</sup> double mutant and in an isogenic strain additionally  
94 carrying the most prevalent compensatory mutation found previously: RpoC<sup>Q1126K</sup><sup>14</sup>. Supporting our  
95 hypothesis, the cost and SOS induction are greatly reduced in the compensated strain (Figure 2A).  
96 Further support was given by analysing 9 compensated clones after the propagation of 3 independent  
97 populations of RpsL<sup>K43T</sup> RpoB<sup>H526Y</sup> double mutants during 15 days, in the absence of antibiotics. All the  
98 compensated clones show decreased cost and SOS induction compared to their resistant ancestrals  
99 (Figure 2B), demonstrating that compensatory evolution widely targets DSBs. These results thus  
100 reinforce the notion that DSBs are an important contributor to the cost of antibiotic resistance  
101 mutations.

102

103           The cost of resistance is environment dependent<sup>2</sup>, and specific Rif<sup>R</sup> and Str<sup>R</sup> mutations show  
104 reduced cost in minimal medium supplemented with glucose<sup>12, 23</sup>. We then reasoned that, if DSBs are an  
105 important cause of the cost, they should be reduced in an environment where the costs are smaller. In  
106 agreement with our hypothesis, resistant mutants show reduced DSBs in minimal medium ([Extended  
107 Data Figure 2A](#)), and a weaker correlation with the cost ([Extended Data Figure 2B](#)), further validating  
108 the strong connection between DSBs and cost.

109

110           Generation of DSBs by transcription-translation uncoupling has been shown to encompass  
111 increased formation of R-loops<sup>18</sup>. We thus hypothesize that deleting the RNase HI, which specifically  
112 degrades R-loops<sup>4</sup>, would cause an increase in DSBs in strains carrying Rif<sup>R</sup> and Str<sup>R</sup> mutations. In  
113 accordance with our hypothesis, both DSBs and the cost of resistance are greatly exacerbated in the  
114 *ΔrnhA* background ([Figure 3A](#), [Extended Data Figure 3](#), [Extended Data Table 1](#), [Extended Data Figure  
115 4](#)). Conversely, overproduction of RNase HI ameliorates both phenotypes in a subset of mutants  
116 ([Extended Data Figure 5](#)); however, strong overproduction is toxic for the cell<sup>24</sup>, irrespectively of its  
117 genotype ([Extended Data Figure 6](#)). These results confirm the involvement of R-loops in the  
118 uncoupling-mediated production of DSBs by resistance and underline the importance of RNase HI  
119 function for its cost.

120

121           We then queried if targeting RNase HI function could be used as a strategy to specifically select  
122 against resistant bacteria in polymorphic communities with high frequency of resistance. RNase HI  
123 inhibitors are currently studied as antiretrovirals<sup>25</sup>. We tested the effect of a commercially available one,

124 RHI001, shown to inhibit the activity of the RNase HI protein of *E. coli in vitro*<sup>5</sup>, in competitions  
125 between sensitive and resistant bacteria. We observed that 500  $\mu$ M of RHI001 increase the cost of most  
126 resistant mutants (Figure 3B, Extended Data Figure 7A). Chemical inhibition was, however, not as  
127 effective as genetic removal (Extended Data Figure 7B), as may be expected, since stability,  
128 diffusibility across the bacterial envelope, pharmacokinetics and pharmacodynamics of RHI001 *in vivo*  
129 are unknown, and potentially suboptimal. Nevertheless, these results suggest that inhibiting RNase HI  
130 may be a novel plausible strategy to specifically select against resistant strains coexisting with sensitive  
131 bacteria, as long as resistant strains fail to evolve adaptations that abrogate their extinction. In order to  
132 test this hypothesis, we propagated a mixture of CFP-labelled sensitive bacteria competing against a  
133 pool of five YFP-labelled single resistant mutants (RpsL<sup>K43N</sup>, RpsL<sup>K43T</sup>, RpoB<sup>H526L</sup>, RpoB<sup>H526Y</sup>, and  
134 RpoB<sup>S531F</sup>) during 15 days, in the absence of antibiotics. We studied the frequency dynamics of resistant  
135 clones under both strong bottlenecks (1:1500), where new adaptive mutations are less likely to spread,  
136 and weak bottlenecks (1:50), where propagation of adapted clones is more probable. In parallel, we  
137 performed identical propagations, but in strains lacking RNase HI, as a proxy for conditions under  
138 optimal inhibition of RNase HI function. We observed that, in the presence of RNase HI, sensitive  
139 bacteria initially outcompete resistant clones but, as the propagation progresses, resistant bacteria  
140 increase in frequency (likely due to compensation<sup>2</sup>), reaching coexistence (Figure 4, blue lines).  
141 Remarkably, in the propagations of strains lacking RNase HI, resistant bacteria were completely  
142 outcompeted and disappeared by day 9 (Figure 4, red lines), even under mild bottlenecks (Extended  
143 Data Figure 8). Altogether, these results show that targeting RNase HI is a novel promising strategy to  
144 selectively eliminate resistant bacteria.

145

146 We found that Rif<sup>R</sup> and Str<sup>R</sup> mutations cause DSBs, which explain 73% of the variation in their  
147 cost (Figure 1, Extended Data Figure 1, Extended Data Table 1). Actually, the mutants showing the  
148 highest cost and DSBs (RpsL<sup>K43N</sup> RpoB<sup>H526Y</sup> and RpsL<sup>K43T</sup> RpoB<sup>H526Y</sup>) combine alleles causing increased  
149 transcription elongation rate<sup>26</sup> and decreased translation rate<sup>27</sup>, arguably resulting in maximized  
150 uncoupling. Coherently, mutations causing decreased translation elongation rate by affecting a different  
151 ribosomal subunit generate DSBs as well (Figure 1C).

152

153 Uncoupling mediated by resistance mutations generates R-loops (Figure 3, Extended Data  
154 Figure 3, Extended Data Table 1, Extended Data Figure 4, Extended Data Figure 5), as uncoupling  
155 caused by chemical inhibition of translation<sup>28, 18, 29</sup>, and lack of RNase HI exacerbates DSBs in single  
156 resistant mutants (Extended Data Figure 4)<sup>30</sup>. Interestingly, single resistance mutations known to have  
157 high cost<sup>31</sup> show great DSBs even in the presence of RNase HI (Extended Data Figure 9A), suggesting  
158 that extensive uncoupling render it insufficient.

159

160 Uncoupling-mediated DSBs can involve increased replication-transcription conflicts<sup>18</sup>, which  
161 cause both R-loops<sup>32</sup> and DSBs<sup>33</sup>. We observed greater DSBs, and correlation with cost, in rich than in  
162 minimal media (Figure 1, Extended Data Figure 2). This might be linked to the fact that replication-  
163 transcription conflicts are maximized when cells replicate fast<sup>34</sup> and reduced in minimal medium  
164 (Extended Data Figure 9B and C), where bacteria replicate at a slower rate<sup>35</sup>. Another observation  
165 supporting the occurrence of replication-transcription conflicts is that, although the cost of Rif<sup>R</sup> and



166 Str<sup>R</sup> mutations in rich medium are very similar at 4h and 24h ([Extended Data Figure 9D](#)), it is  
167 generated in the first 4 hours (comprising exponential growth), while resistant bacteria show advantage  
168 between 4 and 24 hours ([Extended Data Figure 9E](#)), when growth diminishes. Coherently, Rif<sup>R</sup> and/or  
169 Nal<sup>R</sup> (resistant to nalidixic acid) mutants outcompete sensitive bacteria in aging colonies<sup>36, 37</sup>.  
170 Remarkably, both lack of RNase HI and conditions of SOS activation can induce initiation of DNA  
171 replication from sites different than *OriC* (constitutive stable DNA replication, cSDR)<sup>38</sup>. Thus, it is  
172 plausible that Rif<sup>R</sup> and Str<sup>R</sup> mutants induce cSDR, favouring replication-transcription conflicts, and  
173 causing a feed-forward loop of synergistically deleterious effects, further enhanced by the  
174 downregulation of *rnhA* caused by induction of the SOS regulon<sup>39</sup>.

175

176 We revealed RNase HI as a novel promising target specific against resistant bacteria, showing  
177 that its absence causes a very low fitness of resistant bacteria ([Figure 3](#), [Extended Data Figure 3](#),  
178 [Extended Data Table 1](#), [Extended Data Figure 4](#)), and its chemical inhibition increases the cost of  
179 resistance ([Extended Data Figure 7](#)). Importantly, long-term propagation experiments demonstrated  
180 that removal of RNase HI causes resistant clones to be readily outcompeted to extinction by sensitive  
181 bacteria, impeding compensatory evolution ([Figure 4](#), [Extended Data Figure 8](#)). This is specially  
182 important for pathogens that acquire AR exclusively through mutation, such as *Mycobacterium*  
183 *tuberculosis*, which often carries Rif<sup>R</sup> and Str<sup>R</sup> mutations<sup>40</sup>. Interestingly, the RNase HI function is  
184 essential in its close relative *M. smegmatis*, which led to propose RNase HI as a new antimycobacterial  
185 target<sup>41</sup>.

186

187 A better understanding of the mechanisms affecting AR dissemination is urgently needed<sup>6</sup>. Here  
188 we showed that DNA breaks are important determinants of the fitness cost of AR mutations and  
189 revealed the RNase HI as a novel promising target for antimicrobial therapy specific against resistant  
190 bacteria. Our results underline the importance of determining how the bacterial physiology is affected  
191 by antibiotics and resistances, and exemplify how fundamental principles can provide novel strategies  
192 to face the global challenge of AR.

193

## 194 **METHODS**

195

### 196 **Bacterial strains, media and growth conditions**

197

198 All the strains used in this study ([Extended Data Table 2](#)) are derivatives of *E. coli* K12  
199 MG1655 (from strains RB266, RB323 or RB324). Fluorescently labelled strains harbour a copy of  
200 either YFP or CFP under the control of the lac-regulated promoter  $P_{LacO-1}$  inserted either in the *yzgL*  
201 pseudogene locus or in the *galK* gene, a deletion comprising the entire *lac* operon (to make constitutive  
202 the expression of the fluorescent proteins), and the SOS reporter construction  $P_{sulA}$ -*mCherry* inserted in  
203 the *ysaCD* pseudogene locus. The SOS reporter fusion was constructed by replacing a *tetA-sacB*  
204 selectable/counters selectable marker<sup>42</sup> located upstream from a *mCherry-FRT-aph-FRT* cassette  
205 previously inserted in the *ysaCD* locus by the regulatory regions (150bp upstream from the translation  
206 initiation site) of *sulA*. Resistant mutants additionally carry different chromosomal alleles conferring  
207 antibiotic resistance/s. The fluorescent constructions were generated by Lambda-Red recombineering<sup>43</sup>,

208 followed by transference to a clean backgrounds by P1 transduction<sup>44</sup>, and subsequent transduction of  
209 the resistance alleles. The clean deletion of *rnhA* was constructed by markerless recombineering using  
210 a *tetR-P<sub>tet</sub>-ccdB-cat* selection/countersélection cassette as described in Figueroa-Bossi & Bossi<sup>45</sup>, and  
211 subsequent transfer of the markerless deletion to a clean background by P1 transduction, using as  
212 recipient an isogenic strain carrying a deletion of the nearby gene *proB*, which causes proline  
213 auxotrophy, and selecting for growth in minimal medium. The presence of each construction/mutation  
214 was assessed by PCR-mediated amplification of the corresponding region and sequencing. The strain  
215 carrying the Gam-GFP construction (SMR14334<sup>20</sup>) was generously contributed by Professor Susan M.  
216 Rosenberg. The strain with the additional copy of the *rnhA* gene inducible by arabinose (RCE442<sup>24</sup>)  
217 was kindly donated by Dr. Christian J. Rudolph. Derivatives of these strains carrying the *P<sub>sulA</sub>-mCherry*  
218 and different resistance mutations were constructed by P1 trasduction. The plasmid pRB-5 (carrying  
219 the *rnhA* gene under the control of a promoter inducible by anhydrotetracycline) was constructed by  
220 PCR amplification of the vector pZS\*11<sup>46</sup> and the construction *tetR-P<sub>LtetO-1</sub>-rnhA* from strain RB1207,  
221 subsequent restriction with AatII and HindIII, ligation and electroporation. The construction *tetR-P<sub>LtetO-</sub>*  
222 *1-rnhA* in strain RB1207 was made by Lambda-Red recombineering<sup>43</sup>, selection/countersélection<sup>45</sup>, and  
223 a previous *P<sub>LtetO-1</sub>-sfGFP* construction<sup>47</sup>. Cultures were grown in either Lysogeny Broth (LB, Miller  
224 formulation)<sup>48</sup> or M9 broth supplemented with 0.4% glucose<sup>49</sup>, in 96-well plates incubated at 37°C with  
225 shaking (700 r.p.m.) in a Grant-bio PHMP-4 benchtop incubator. In the experiments including the  
226 RNase HI inhibitor 2-[[[3-Bromo-5-(2-furanyl)-7-(trifluoromethyl)pyrazolo[1,5-a]pyrimidin-2-  
227 yl]carbonyl]amino]-4,5,6,7-tetrahydro-benzo[b]thiophene-3-carboxylic acid ethyl ester (RHI001), the  
228 medium was supplemented with 500 µM of RHI001 (Glix Laboratories Inc., catalog number GLXC-

229 03982). Solid media was LB containing 1.5% agar, supplemented when necessary with antibiotics at  
230 the following concentrations: rifampicin (100 µg/ml), streptomycin (100 µg/ml), ampicillin (100  
231 µg/ml), erythromycin (150 µg/ml), kanamycin (100 µg/ml), chloramphenicol (25 µg/ml).

232

### 233 **Competitive fitness/SOS induction assays**

234

235 The relative fitness (selection coefficient per generation) of each YFP-tagged resistant strain  
236 was measured by competitive growth against an isogenic sensitive strain *E. coli* K12 MG1655  
237 constitutively expressing CFP and carrying the SOS reporter. The formula used to calculate the  
238 selection coefficient was  $s = [\ln(NR_f/Nr_f) - \ln(NR_i/Nr_i)] / \ln(NS_f/NS_i)$ , being  $NR_i$  and  $NR_f$  the initial and  
239 final number of resistant bacteria, and  $NS_i$  and  $NS_f$  the initial and final number of sensitive bacteria. The  
240 competitor strains were first streaked out of their respective frozen vials, then individual colonies were  
241 inoculated separately in medium without antibiotics and incubated overnight (approximately 16h); the  
242 next morning, the number of cells in each culture was measured by Flow Cytometry, and 10 µl of 1:1  
243 mixtures of YFP and CFP bacteria were added to 140 µl of medium, at an initial number of  
244 approximately  $10^6$  cells. The initial and final frequencies of the strains were obtained by counting their  
245 cell numbers in the Flow Cytometer. Generation time was estimated from the doubling time of the  
246 reference strain (approximately five generations at 4h, and approximately eight generations at 24h), and  
247 the fitness was determined as the average of the independent replicates for each competition. The  
248 proportion of SOS-induced bacteria was quantified as the number of either YFP-tagged or CFP-  
249 labelled bacteria showing red fluorescence (from the *P<sub>sulA</sub>-mCherry* SOS reporter fusion) above a

250 threshold determined by the fluorescence levels of the control strains *lexA (ind-)* (constitutive  
251 repression of the SOS response) and  $\Delta lexA$  (constitutive activation of the SOS response)<sup>50</sup>; an  
252 illustrative slide is in Supplementary Information. The data represented is the induction level of each  
253 mutant normalized with respect to the induction levels of the sensitive it is competing against.

254

## 255 **Flow Cytometry**

256

257 A BD LSR Fortessa™ SORP flow cytometer was used to quantify bacteria, using a 96-well  
258 plate High-Throughput Sampler (HTS) and SPHERO fluorescent spheres (AccuCount 2.0  $\mu\text{m}$  blank  
259 particles), in order to accurately measure volumes. Bacterial numbers were calculated based on the  
260 counts of fluorescently labelled bacteria with respect the known number of beads added to a given  
261 volume. The instrument was equipped with a 488 nm laser used for scatter parameters and YFP  
262 detection, a 442 nm laser for CFP detection and a 561 nm laser for mCherry detection. Relative to  
263 optical configuration, CFP, YPF and mCherry were measured using bandpass filters in the range of  
264 470/20 nm, 540/30 nm and 630/75nm, respectively. The analyser is also equipped with a forward  
265 scatter (FSC) detector in a photomultiplier tube (PMT) to detect bacteria. The samples were acquired  
266 using FACSDiVa (version 6.2) software, and analysed using FlowJo (version X 10.0.7r2). All Flow  
267 Cytometry experiments were performed at the Flow Cytometry Facility of Instituto Gulbenkian de  
268 Ciência, Oeiras, Portugal.

269

## 270 **Selection for Erm<sup>R</sup> bacteria**

271

272           Fifteen independent colonies of sensitive bacteria were separately inoculated in LB in a 96-well  
273 plate, incubated at at 37°C with shaking (700 r.p.m) for 7 hours, and 0.1ml of either independent  
274 culture was plated onto a LB agar plate supplemented with 150 µg/ml erythromycin, and incubated at  
275 37°C for 5 days (Erm<sup>R</sup> strains grow in the presence of erythromycin, albeit slowly). Colonies able to  
276 grow in these plates were streaked onto plates supplemented with 150 µg/ml erythromycin, in order to  
277 further assess their *bona fide* resistance, and the *rplD*, and *rplV* genes of the resistant clones were  
278 amplified by PCR and sequenced.

279

## 280 **Microscopy**

281

282           Early exponential cultures were diluted into medium containing the inducer of the Gam-GFP  
283 construction (anhydrotetracycline, 25ng/ml) and incubated at 37°C with shaking (240 r.p.m.) for 3h,  
284 prior to imaging. Bacterial solutions were then placed onto 1% agarose (in 1X PBS) pads mounted in  
285 adhesive frames between the microscope slide and a coverglass. Images were acquired on an Applied  
286 Precision DeltavisionCORE system, mounted on an Olympus IX71 inverted microscope, coupled to a  
287 Cascade II 1024x1024 EM-CCD camera, using an Olympus 100x 1.4NA Uplan SAPO Oil immersion  
288 objective, where GFP and mCherry were imaged with FITC (Ex: 475/28, EM: 528/38) and TRITC (Ex:  
289 542/28, Em: 617/73) fluorescence filtersets, respectively, and DIC optics. Images were deconvoluted

290 with Applied Precision's softWorx software, and prepared for presentation (cropping smaller fields to  
291 facilitate visualization, and false-coloring green and red fluorescent signals) using Fiji/ImageJ.

292

### 293 **Long-term propagations of polymorphic populations**

294

295 The CFP-tagged sensitive (either WT or  $\Delta rnhA$ ) and the five YFP-labelled resistant bacterial  
296 (either (RpsL<sup>K43N</sup>, RpsL<sup>K43T</sup>, RpoB<sup>H526L</sup>, RpoB<sup>H526Y</sup>, and RpoB<sup>S531F</sup> or  $\Delta rnhA$  RpsL<sup>K43N</sup>,  $\Delta rnhA$  RpsL<sup>K43T</sup>,  
297  $\Delta rnhA$  RpoB<sup>H526L</sup>,  $\Delta rnhA$  RpoB<sup>H526Y</sup>, and  $\Delta rnhA$  RpoB<sup>S531F</sup>) were streaked individually onto LB agar  
298 plates and incubated overnight at 37°C. The next day, three independent colonies from each strain were  
299 inoculated separately in LB broth (150  $\mu$ l per well) in 96-well plate and incubated overnight at 37°C  
300 with shaking (700 r.p.m). The next day, bacteria were quantified by Flow Cytometry, and three  
301 1:1:1:1:1:1 mixtures of the sensitive and either resistant bacteria were added to 140  $\mu$ l of medium, at a  
302 initial number of approximately  $10^6$  cells (ordered in a checkered pattern to avoid cross-  
303 contaminations). The initial frequencies of the fluorescent strains were confirmed by Flow Cytometry.  
304 Every 24h, during 15 days, 10  $\mu$ l of bacteria culture was diluted by a factor of  $10^{-2}$ , then transferred to  
305 140  $\mu$ l fresh LB and allowed to grow for additional 24h, reaching approximately  $10^9$  cells/ml. In  
306 parallel, cell numbers were counted using the Flow Cytometer, in order to measure the frequency of  
307 each strain in the mixed population during the experiment, by collecting a sample (10  $\mu$ l) from the  
308 spent culture each day.

309

### 310 **Statistical analyses**

311

312 All analyses were conducted using either Libreoffice Calc version 5.4.1.2 ([www.libreoffice.org](http://www.libreoffice.org))  
313 software, R version 3.4.4 ([www.r-project.org](http://www.r-project.org)) software via RStudio version 1.1.442 interface  
314 ([www.rstudio.com](http://www.rstudio.com)) or GraphPad Prism version 7.04 ([www.graphpad.com](http://www.graphpad.com)). For each set of  
315 competitions ( $n \geq 3$ ), two-tailed unpaired Student's *t*-tests were used. For testing the association between  
316 the fitness cost and the level of SOS induction, a linear regression of the *s* with the logarithm of the  
317 fold change in SOS induction of each resistant clone (with respect to the sensitive bacteria it is  
318 competing against in the same well), was used.

319

#### 320 **Data availability**

321

322 The raw images used for Extended Data Table 1, Extended Data Figure 1, and Extended Data  
323 Figure 3 are available in Zenodo (DOI: 10.5281/zenodo.3381746).

324

#### 325 **REFERENCES**

1. Andersson, D. I. & Hughes, D. Antibiotic resistance and its cost: is it possible to reverse resistance? *Nat. Rev. Microbiol.* **8**, 260–271 (2010).
2. Durão, P., Balbontín, R. & Gordo, I. Evolutionary Mechanisms Shaping the Maintenance of Antibiotic Resistance. *Trends Microbiol.* **26**, 677–691 (2018).
3. Vogwill, T. & MacLean, R. C. The genetic basis of the fitness costs of antimicrobial resistance: a meta-analysis approach. *Evol. Appl.* **8**, 284–295 (2015).



4. Tadokoro, T. & Kanaya, S. Ribonuclease H: molecular diversities, substrate binding domains, and catalytic mechanism of the prokaryotic enzymes. *FEBS J.* **276**, 1482–1493 (2009).
5. Kim, J. *et al.* Identification of two HIV inhibitors that also inhibit human RNaseH2. *Mol. Cells* **36**, 212–218 (2013).
6. Bush, K. *et al.* Tackling antibiotic resistance. *Nat. Rev. Microbiol.* **9**, 894–896 (2011).
7. Jin, D. J. & Gross, C. A. Characterization of the pleiotropic phenotypes of rifampin-resistant *rpoB* mutants of *Escherichia coli*. *J. Bacteriol.* **171**, 5229–5231 (1989).
8. Jin, D. J. & Zhou, Y. N. Mutational analysis of structure-function relationship of RNA polymerase in *Escherichia coli*. *Methods Enzymol.* **273**, 300–319 (1996).
9. Ozaki, M., Mizushima, S. & Nomura, M. Identification and functional characterization of the protein controlled by the streptomycin-resistant locus in *E. coli*. *Nature* **222**, 333–339 (1969).
10. Qi, Q., Preston, G. M. & MacLean, R. C. Linking system-wide impacts of RNA polymerase mutations to the fitness cost of rifampin resistance in *Pseudomonas aeruginosa*. *mBio* **5**, e01562 (2014).
11. Zhou, Y. N. & Jin, D. J. The *rpoB* mutants destabilizing initiation complexes at stringently controlled promoters behave like ‘stringent’ RNA polymerases in *Escherichia coli*. *Proc. Natl. Acad. Sci. U. S. A.* **95**, 2908–2913 (1998).
12. Paulander, W., Maisnier-Patin, S. & Andersson, D. I. The fitness cost of streptomycin resistance depends on *rpsL* mutation, carbon source and RpoS ( $\sigma^S$ ). *Genetics* **183**, 539–546, 1SI-2SI (2009).
13. Pelchovich, G. *et al.* Ribosomal mutations affecting the translation of genes that use non-optimal codons. *FEBS J.* **281**, 3701–3718 (2014).
14. Moura de Sousa, J., Balbontín, R., Durão, P. & Gordo, I. Multidrug-resistant bacteria compensate for the epistasis between resistances. *PLoS Biol.* **15**, e2001741 (2017).

15. Burmann, B. M. *et al.* A NusE:NusG complex links transcription and translation. *Science* **328**, 501–504 (2010).
16. Herbert, K. M. *et al.* E. coli NusG inhibits backtracking and accelerates pause-free transcription by promoting forward translocation of RNA polymerase. *J. Mol. Biol.* **399**, 17–30 (2010).
17. Proshkin, S., Rahmouni, A. R., Mironov, A. & Nudler, E. Cooperation between translating ribosomes and RNA polymerase in transcription elongation. *Science* **328**, 504–508 (2010).
18. Dutta, D., Shatalin, K., Epshtein, V., Gottesman, M. E. & Nudler, E. Linking RNA polymerase backtracking to genome instability in *E. coli*. *Cell* **146**, 533–543 (2011).
19. Quillardet, P., Huisman, O., D’Ari, R. & Hofnung, M. SOS chromotest, a direct assay of induction of an SOS function in *Escherichia coli* K-12 to measure genotoxicity. *Proc. Natl. Acad. Sci. U. S. A.* **79**, 5971–5975 (1982).
20. Shee, C. *et al.* Engineered proteins detect spontaneous DNA breakage in human and bacterial cells. *eLife* **2**, e01222 (2013).
21. Sedlyarova, N. *et al.* Natural RNA Polymerase Aptamers Regulate Transcription in *E. coli*. *Mol. Cell* **67**, 30-43.e6 (2017).
22. Zaman, S., Fitzpatrick, M., Lindahl, L. & Zengel, J. Novel mutations in ribosomal proteins L4 and L22 that confer erythromycin resistance in *Escherichia coli*. *Mol. Microbiol.* **66**, 1039–1050 (2007).
23. Trindade, S., Sousa, A. & Gordo, I. Antibiotic resistance and stress in the light of Fisher’s model. *Evol. Int. J. Org. Evol.* **66**, 3815–3824 (2012).
24. Stockum, A., Lloyd, R. G. & Rudolph, C. J. On the viability of *Escherichia coli* cells lacking DNA topoisomerase I. *BMC Microbiol.* **12**, 26 (2012).

25. Wang, X., Gao, P., Menendez-Arias, L., Liu, X. & Zhan, P. Update on Recent Developments in Small Molecular HIV-1 RNase H Inhibitors (2013-2016): Opportunities and Challenges. *Curr. Med. Chem.* **25**, 1682–1702 (2018).
26. Fisher, R. F. & Yanofsky, C. Mutations of the beta subunit of RNA polymerase alter both transcription pausing and transcription termination in the trp operon leader region in vitro. *J. Biol. Chem.* **258**, 8146–8150 (1983).
27. Schrag, S. J. & Perrot, V. Reducing antibiotic resistance. *Nature* **381**, 120–121 (1996).
28. Broccoli, S. *et al.* Effects of RNA polymerase modifications on transcription-induced negative supercoiling and associated R-loop formation. *Mol. Microbiol.* **52**, 1769–1779 (2004).
29. Negro, V. *et al.* RadD Contributes to R-Loop Avoidance in Sub-MIC Tobramycin. *mBio* **10**, (2019).
30. Kogoma, T. *Escherichia coli* RNA polymerase mutants that enhance or diminish the SOS response constitutively expressed in the absence of RNase HI activity. *J. Bacteriol.* **176**, 1521–1523 (1994).
31. Trindade, S. *et al.* Positive epistasis drives the acquisition of multidrug resistance. *PLoS Genet.* **5**, e1000578 (2009).
32. Lang, K. S. *et al.* Replication-Transcription Conflicts Generate R-Loops that Orchestrate Bacterial Stress Survival and Pathogenesis. *Cell* **170**, 787-799.e18 (2017).
33. Merrikh, H., Zhang, Y., Grossman, A. D. & Wang, J. D. Replication-transcription conflicts in bacteria. *Nat. Rev. Microbiol.* **10**, 449–458 (2012).
34. Merrikh, H., Machón, C., Grainger, W. H., Grossman, A. D. & Sultanas, P. Co-directional replication-transcription conflicts lead to replication restart. *Nature* **470**, 554–557 (2011).
35. Wang, C. H. & Koch, A. L. Constancy of growth on simple and complex media. *J. Bacteriol.* **136**, 969–975 (1978).

36. Wrande, M., Roth, J. R. & Hughes, D. Accumulation of mutants in ‘aging’ bacterial colonies is due to growth under selection, not stress-induced mutagenesis. *Proc. Natl. Acad. Sci. U. S. A.* **105**, 11863–11868 (2008).
37. Katz, S. & Hershberg, R. Elevated mutagenesis does not explain the increased frequency of antibiotic resistant mutants in starved aging colonies. *PLoS Genet.* **9**, e1003968 (2013).
38. Kogoma, T. Stable DNA replication: interplay between DNA replication, homologous recombination, and transcription. *Microbiol. Mol. Biol. Rev. MMBR* **61**, 212–238 (1997).
39. Quiñones, A., Kücherer, C., Piechocki, R. & Messer, W. Reduced transcription of the *rnh* gene in *Escherichia coli* mutants expressing the SOS regulon constitutively. *Mol. Gen. Genet. MGG* **206**, 95–100 (1987).
40. Almeida Da Silva, P. E. A. & Palomino, J. C. Molecular basis and mechanisms of drug resistance in *Mycobacterium tuberculosis*: classical and new drugs. *J. Antimicrob. Chemother.* **66**, 1417–1430 (2011).
41. Minias, A. E. *et al.* RNase HI Is Essential for Survival of *Mycobacterium smegmatis*. *PloS One* **10**, e0126260 (2015).
42. Li, X.-T., Thomason, L. C., Sawitzke, J. A., Costantino, N. & Court, D. L. Positive and negative selection using the *tetA-sacB* cassette: recombineering and P1 transduction in *Escherichia coli*. *Nucleic Acids Res.* **41**, e204 (2013).
43. Datsenko, K. A. & Wanner, B. L. One-step inactivation of chromosomal genes in *Escherichia coli* K-12 using PCR products. *Proc. Natl. Acad. Sci. U. S. A.* **97**, 6640–6645 (2000).
44. Lennox, E. S. Transduction of linked genetic characters of the host by bacteriophage P1. *Virology* **1**, 190–206 (1955).

45. Figueroa-Bossi, N. & Bossi, L. Recombineering applications for the mutational analysis of bacterial RNA-binding proteins and their sites of action. *Methods Mol. Biol. Clifton NJ* **1259**, 103–116 (2015).
46. Subramaniam, A. R., Pan, T. & Cluzel, P. Environmental perturbations lift the degeneracy of the genetic code to regulate protein levels in bacteria. *Proc. Natl. Acad. Sci. U. S. A.* **110**, 2419–2424 (2013).
47. Balbontín, R., Vlamakis, H. & Kolter, R. Mutualistic interaction between *Salmonella enterica* and *Aspergillus niger* and its effects on *Zea mays* colonization. *Microb. Biotechnol.* **7**, 589–600 (2014).
48. Bertani, G. Studies on lysogenesis. I. The mode of phage liberation by lysogenic *Escherichia coli*. *J. Bacteriol.* **62**, 293–300 (1951).
49. Maniatis et al. *Molecular cloning: a laboratory manual* (CSHL Press).
50. Lin, L. L. & Little, J. W. Isolation and characterization of noncleavable (Ind-) mutants of the LexA repressor of *Escherichia coli* K-12. *J. Bacteriol.* **170**, 2163–2173 (1988).

326 **AUTHORS CONTRIBUTIONS**

327

328 R.B. and I.G. conceived the study and designed the experiments, R.B. constructed the strains  
329 and performed the experiments, R.B. and I.G. analysed and interpreted the data, R.B. created the figures  
330 and wrote the manuscript with input from I.G., I.G. provided resources, funding and supervision.

331

332 **ACKNOWLEDGEMENTS**

333

334 We thank Professor Susan M. Rosenberg and Dr. Christian J. Rudolph for kindly providing  
335 bacterial strains, and Rui Gardner, Claudia Bispo, Mariana Fernandes, Marta Monteiro and the Flow  
336 Cytometry Facility of Instituto Gulbenkian de Ciência for their services and assistance, and Nuno  
337 Pimpão Martins and the IGC's Advanced Imaging Facility (AIF-UIC) team for the microscopy  
338 technical assistance. This work was funded by the the Marie Skłodowska-Curie Actions (MSCA) with  
339 the fellowship 746690-ResistEpist-H2020-MSCA-IF-2016/H2020-MSCA-IF-2016, to R.B., and  
340 partially supported by ONEIDA project (LISBOA-01-0145-FEDER-016417) co-funded by FEEI -  
341 "Fundos Europeus Estruturais e de Investimento" from "Programa Operacional Regional Lisboa 2020",  
342 and by national funds from FCT - "Fundação para a Ciência e a Tecnologia, to I.G. R.B. was also  
343 supported by the Fundação para a Ciência e a Tecnologia (FCT) with the fellowship  
344 SFRH/BDP/109517/2015. The authors thank Karina Xavier, Leonardo Gastón Guilgur, Pol Nadal  
345 Jiménez, Chris Diwo and the members of the Gordo and Xavier labs for critically reading earlier  
346 versions of this manuscript.

347

348

349

350

351

352

353

354

355

356

357

358 FIGURES

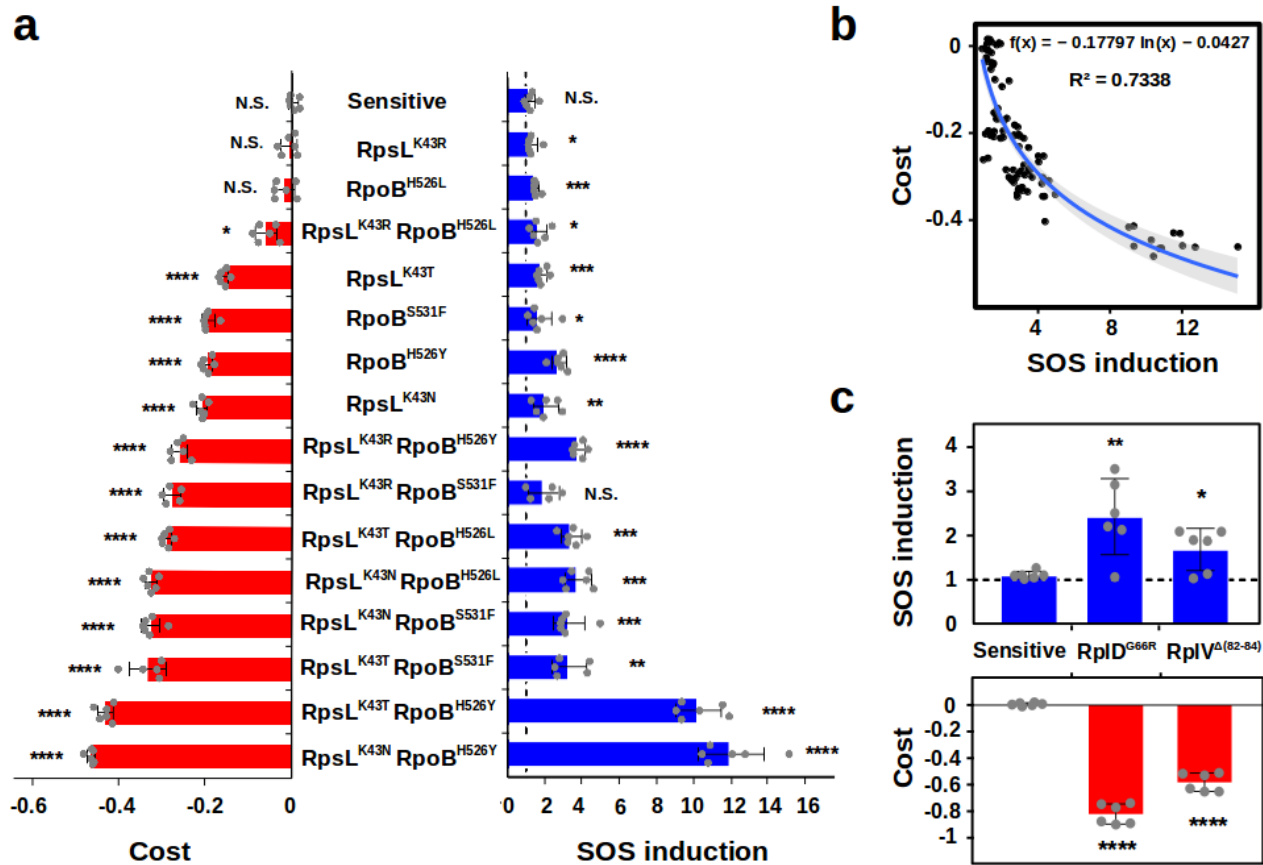

359 **Figure 1. The fitness cost of resistance mutations correlates with the level of induction of the SOS response.** **a.**  
 360 Selection coefficient per generation, representing the fitness cost (red bars) and fold-change in SOS induction (blue bars) of  
 361 sensitive bacteria and single and double resistant mutants in LB broth at 4 hours. The strains are ordered from lower to  
 362 higher fitness cost (top to bottom). The dashed line indicates no SOS induction. Error bars represent mean  $\pm$  standard  
 363 deviation ( $n \geq 5$ ). N.S. non-significant; \* $P < 0.05$ ; \*\* $P < 0.01$ ; \*\*\* $P < 0.001$ ; \*\*\*\* $P < 0.0001$  (two-tailed Student's  $t$  test). **b.**  
 364 Correlation between the fitness cost (y axis) and the SOS induction (x axis) representing all the data points from (A). The  
 365 blue line represents the logarithmic regression line, and the grey area represents the 95% confidence interval. **c.** Erm<sup>R</sup>  
 366 mutants show induction of the SOS response. Fold change in SOS induction (blue bars) and selection coefficient per  
 367 generation, representing the fitness cost (red bars) of sensitive bacteria and Erm<sup>R</sup> resistant mutants in LB broth at 4 hours.  
 368 The dashed line indicates no SOS induction. Error bars represent mean  $\pm$  standard deviation of independent biological  
 369 replicates ( $n=6$ ). N.S. non-significant; \* $P < 0.05$ ; \*\* $P < 0.01$ ; \*\*\* $P < 0.001$ ; \*\*\*\* $P < 0.0001$  (two-tailed Student's  $t$  test).

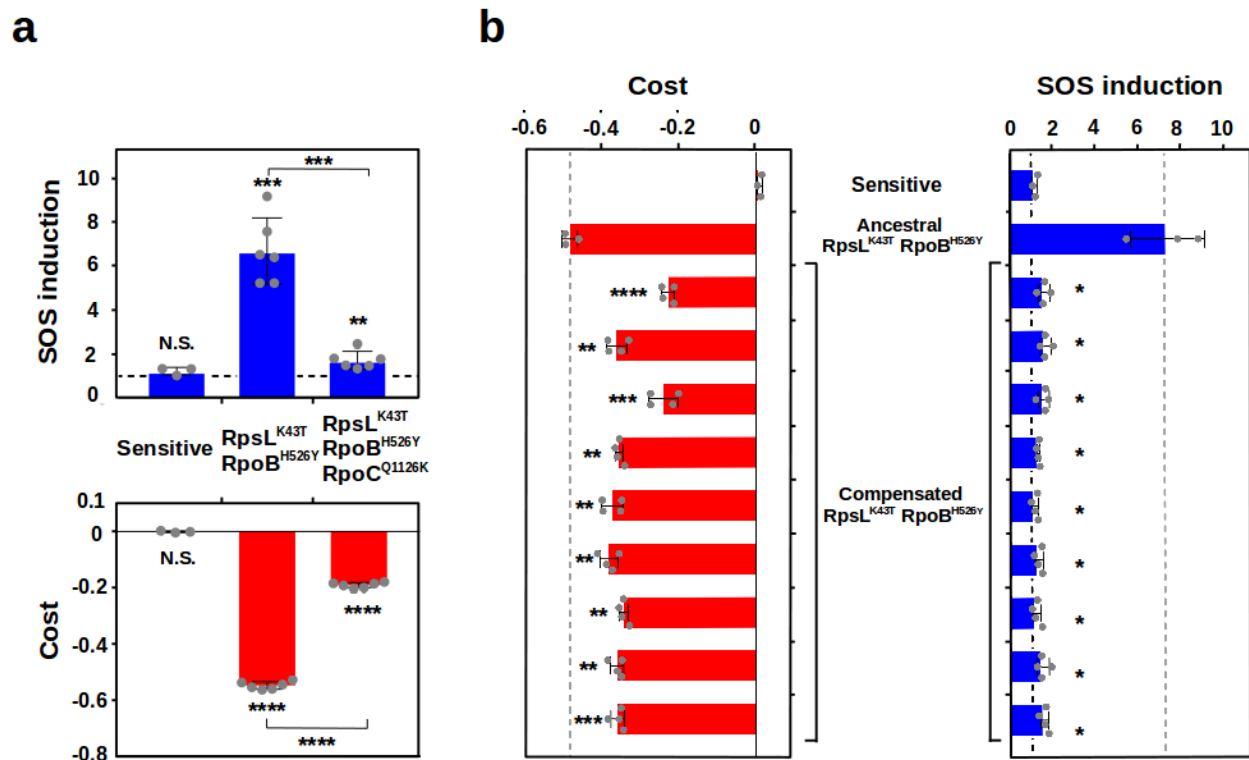

370 **Figure 2. Compensated strains show reduced SOS response.** **a.** Fold-change in SOS induction (blue bars) and selection  
 371 coefficient per generation, representing the fitness cost (red bars), of sensitive (left) double resistant (center) and double  
 372 resistant carrying a compensatory mutation (right) bacteria in LB broth at 4 hours. The dashed line indicates no SOS  
 373 induction. Error bars represent mean  $\pm$  standard deviation ( $n \geq 3$ ). N.S. non-significant; \* $P < 0.05$ ; \*\* $P < 0.01$ ; \*\*\* $P < 0.001$ ;  
 374 \*\*\*\* $P < 0.0001$  (two-tailed Student's  $t$  test). **b.** Selection coefficient per generation, representing the fitness cost (red bars),  
 375 and fold change in SOS induction (blue bars) of sensitive, ancestral  $RpsL^{K43T} RpoB^{H526Y}$  and nine compensated  $RpsL^{K43T}$   
 376  $RpoB^{H526Y}$  clones in LB broth at 4 hours. The black dashed line indicates no SOS induction. The grey dashed lines mark the  
 377 cost/SOS of the ancestral double mutant. Error bars represent mean  $\pm$  standard deviation of independent biological  
 378 replicates ( $n \geq 3$ ). N.S. non-significant; \* $P < 0.05$ ; \*\* $P < 0.01$ ; \*\*\* $P < 0.001$ ; \*\*\*\* $P < 0.0001$  (two-tailed Student's  $t$  test).



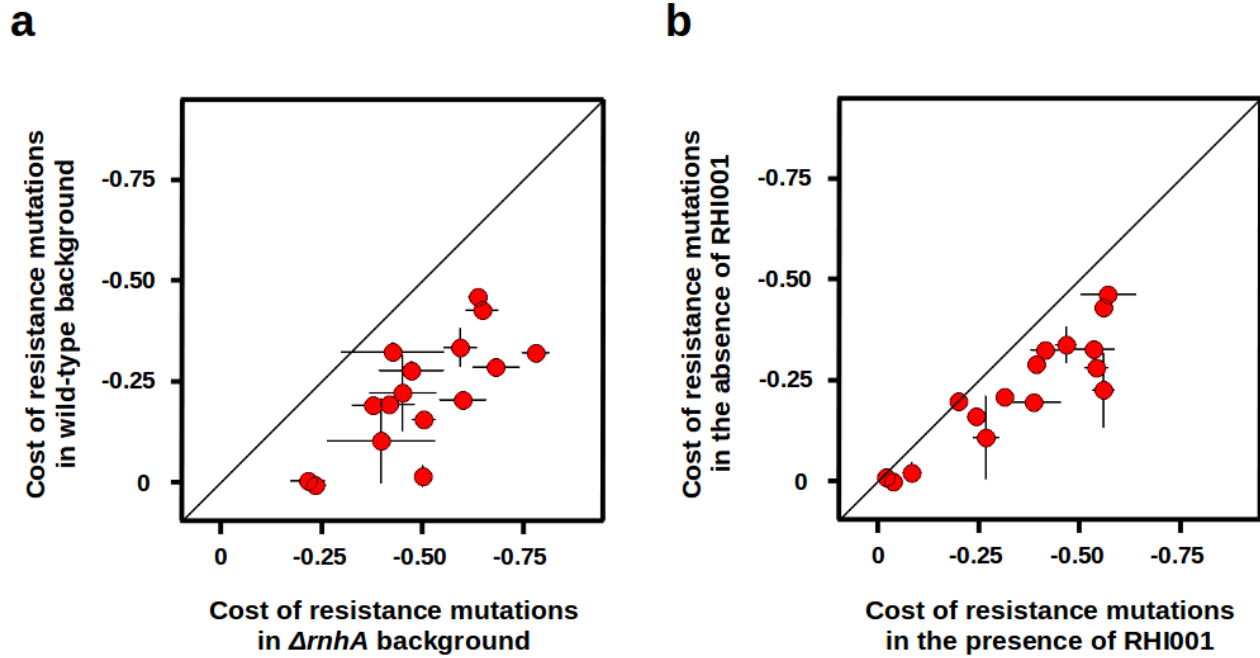

380 **Figure 3. The lack of RNase HI function greatly increases the cost of resistance.** **a.** Correlation between the fitness cost  
381 of resistance mutations in wild-type (y axis) or  $\Delta rnhA$  backgrounds (x axis). The black line represents the linear regression  
382 if the costs were identical. **B.** Correlation between the fitness cost of resistance mutations in the absence of the RNase HI  
383 inhibitor (y axis) or in its presence (x axis). The black line represents the linear regression if the costs were identical. The  
384 values corresponding to the wild-type background in panel **a** and to absence of RHI001 in panel **b** are those shown in Figure  
385 1A. Error bars represent mean  $\pm$  standard deviation of independent biological replicates ( $n \geq 3$ ).

386

387

388

389

390

391

392

393

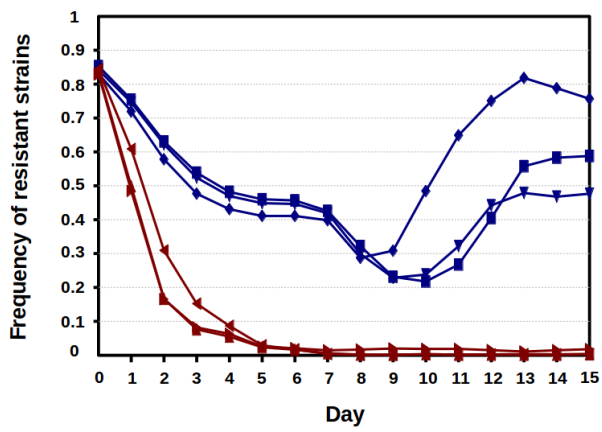

**Figure 4. Lack of RNase HI favours outcompetition of resistant mutants by sensitive bacteria.** Frequency of single resistant mutants during three independent long-term competitions against sensitive bacteria either in a genetic background including RNase HI (blue lines) or in a  $\Delta rnhA$  background (red lines), imposing a strong bottleneck (1:1500 dilutions).

394  
395  
396  
397  
398  
399  
400  
401  
402  
403  
404  
405  
406  
407  
408  
409  
410  
411  
412  
413  
414  
415  
416  
417  
418  
419  
420  
421  
422

423 **Extended Data Table 1. Percentage of cells showing Gam-GFP foci in sensitive and resistant bacteria either in wild-**  
424 **type or *ΔrnhA* backgrounds.** Except in the *Δdam* positive control (in which over 100 cells sufficed to provide an  
425 illustrative example), at least 1000 cells per group were analysed.

426

427 *Δdam* (positive control) ..... 21.28%

428 Sensitive ..... 0.72%

429 *rpsL* (K43N) ..... 0.73%

430 *rpoB* (H526Y) ..... 0.96%

431 *rpsL* (K43N) *rpoB* (H526Y) ..... 10.71%

432 *ΔrnhA* (sensitive) ..... 9.27%

433 *ΔrnhA rpsL* (K43N) ..... 33.92%

434 *ΔrnhA rpoB* (H526Y) ..... 10.02%

435 *ΔrnhA rpsL* (K43N) *rpoB* (H526Y) ..... 49.90%

436

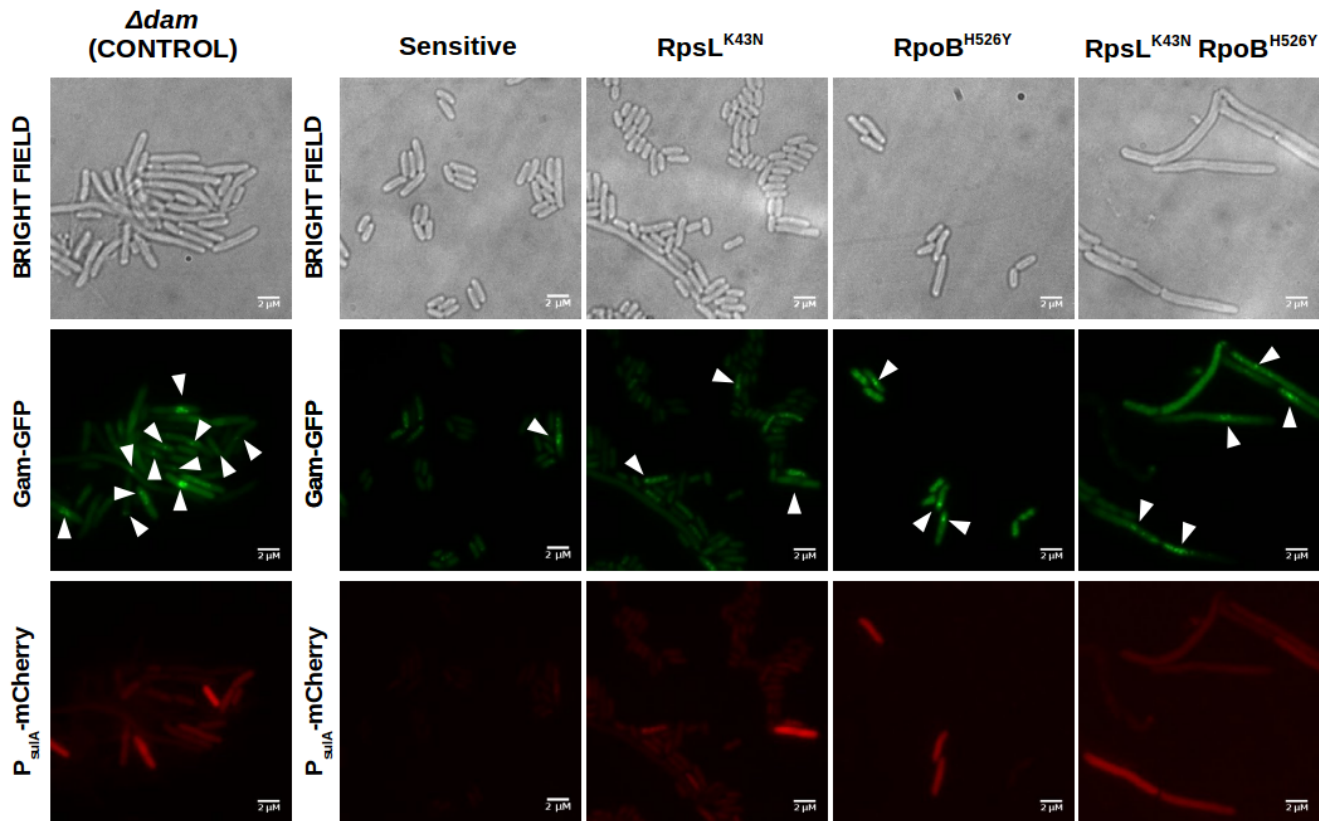

437 **Extended Data Figure 1. Visualization of DNA breaks and SOS induction of sensitive, single and double resistant**  
438 **strains by epifluorescence microscopy.** Bacterial cells show a disperse faint green fluorescence distributed along the  
439 cytoplasm, unless DSBs are present; upon generation of DSBs, the disperse fluorescence concentrates in bright fluorescent  
440 foci (central panels, false-colored in green). Red fluorescence (bottom panels, false-colored in red) is absent until the SOS  
441 response is activated due to the presence of DSBs. Cell elongation (top panels) is a well-known phenotype derived from the  
442 inhibition of cell division by SOS-regulated proteins.

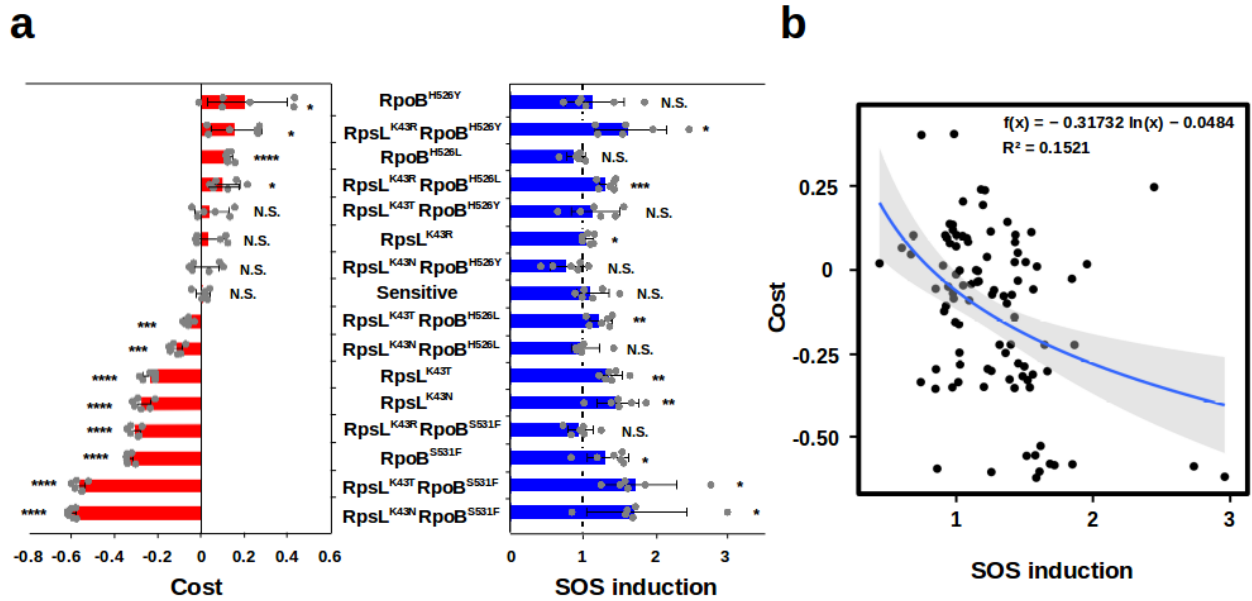

443 **Extended Data Figure 2. The SOS response is reduced in minimal medium supplemented with glucose.** **a.** Selection  
 444 coefficient per generation, representing the fitness cost (red bars), and fold change in SOS induction (blue bars) of sensitive  
 445 bacteria and single and double resistant mutants in minimal medium at 8 hours. The strains are ordered from lower to higher  
 446 fitness cost (top to bottom). The dashed line indicates no SOS induction. Error bars represent mean  $\pm$  standard deviation of  
 447 independent biological replicates ( $n=6$ ). N.S. non-significant; \* $P < 0.05$ ; \*\* $P < 0.01$ ; \*\*\* $P < 0.001$ ; \*\*\*\* $P < 0.0001$  (two-  
 448 tailed Student's  $t$  test). **b.** Correlation between the fitness cost (y axis) and the SOS induction (x axis) representing all the  
 449 data points from panel **a**. The blue line represents the logarithmic regression line, and the grey area represents the 95%  
 450 confidence interval.

## *ΔrnhA*

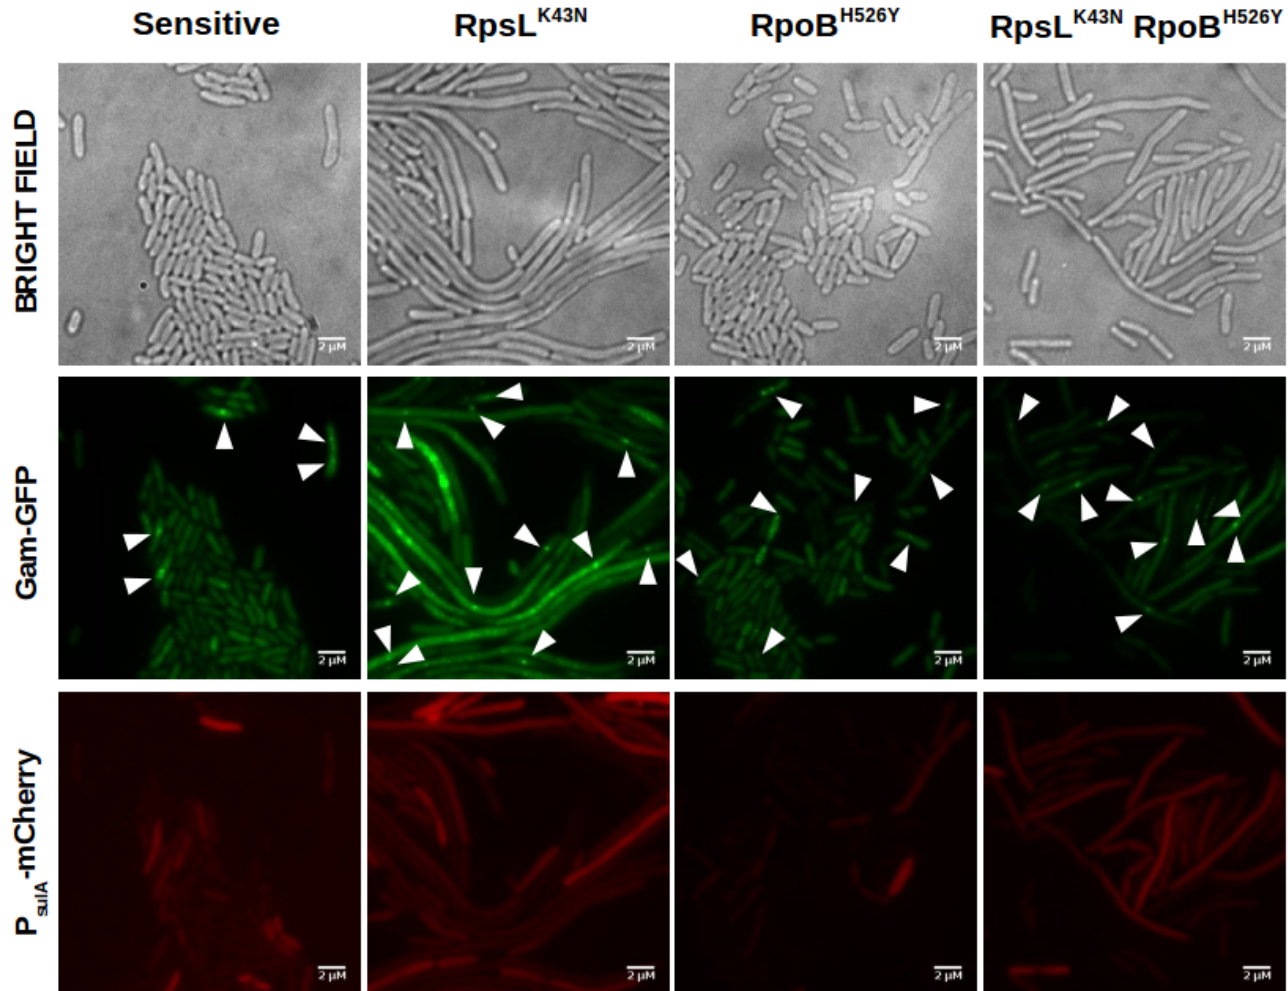

451 **Extended Data Figure 3. Visualization of DNA breaks and SOS induction of sensitive, single and double resistant**  
452 **strains in a *ΔrnhA* background by epifluorescence microscopy.** Bacterial cells show a disperse faint green fluorescence  
453 distributed along the cytoplasm, unless DSBs are present; upon generation of DSBs, the disperse fluorescence concentrates  
454 in bright fluorescent foci (central panels, false-colored in green). Red fluorescence (bottom panels, false-colored in red) is  
455 absent until the SOS response is activated due to the presence of DSBs. Cell elongation (top panels) is a well known  
456 phenotype derived from cell division inhibition by SOS-regulated proteins.

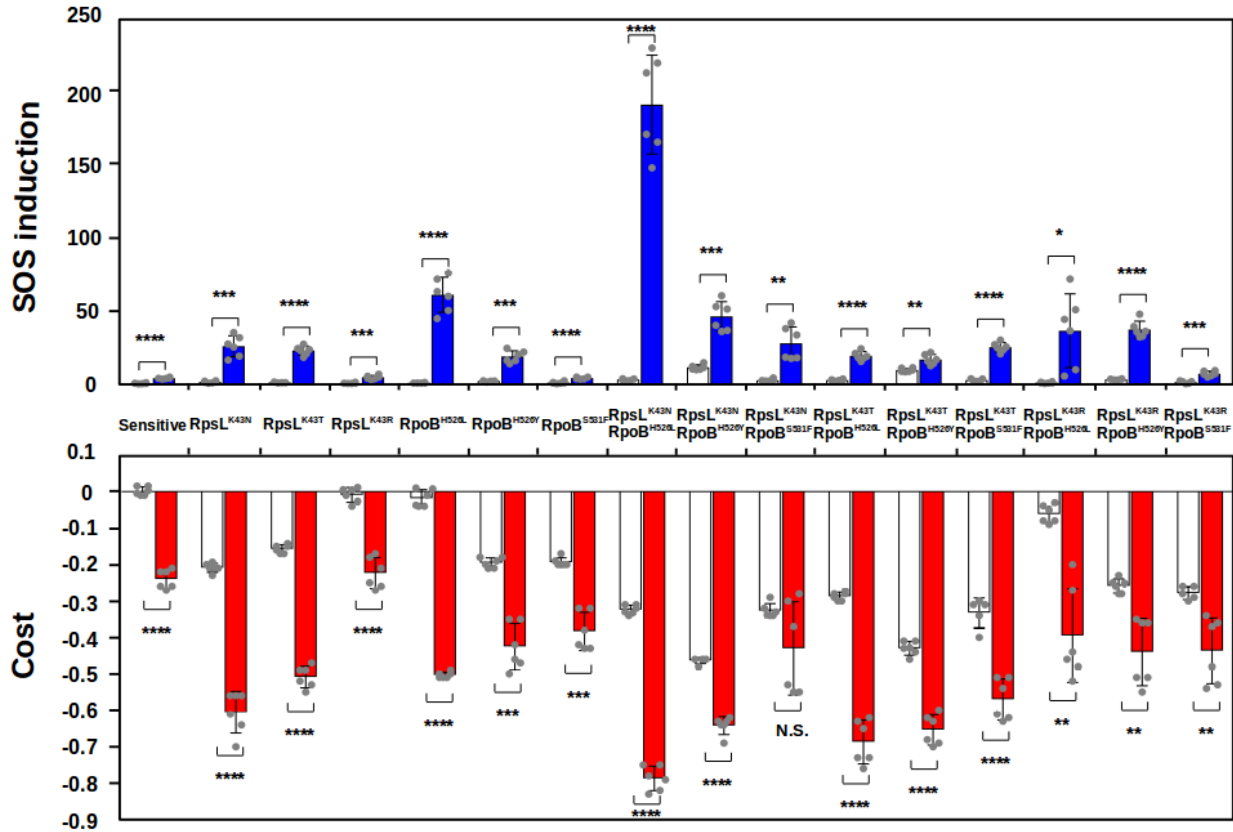

457 **Extended Data Figure 4. Deletion of *rnhA* (encoding RNase HI) greatly increases both the fitness cost and the SOS**  
 458 **induction.** Fold change in SOS induction (blue bars) and selection coefficient per generation, representing the fitness cost  
 459 (red bars), of single and double resistant strains in a  $\Delta rnhA$  background. The white bars represent the corresponding values  
 460 in bacteria with an intact *rnhA* gene (data from the experiments shown in Figure 1), for comparison. Error bars represent  
 461 mean  $\pm$  standard deviation of independent biological replicates (n=6). N.S. non-significant; \* $P < 0.05$ ; \*\* $P < 0.01$ ; \*\*\* $P <$   
 462 0.001; \*\*\*\* $P < 0.0001$  (two-tailed Student's *t* test).

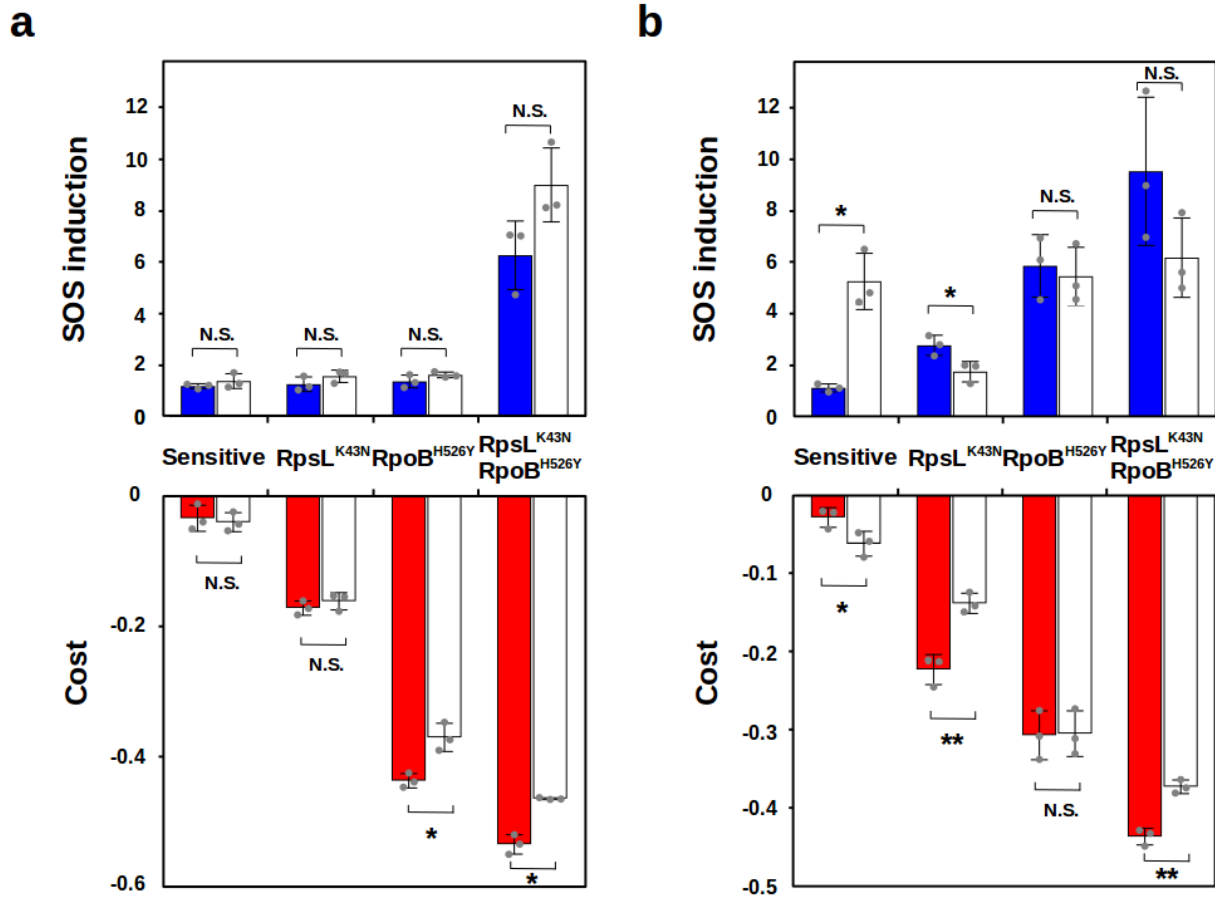

463 **Extended Data Figure 5. Mild overproduction of RNase HI ameliorates both cost and SOS induction.** Fold change in  
 464 SOS induction (top) and selection coefficient per generation, representing the fitness cost (bottom), of sensitive bacteria  
 465 (left), two single resistant mutants (center) and the double mutant resulting from combining these two alleles (right) at 4h  
 466 (a) or 24h (b) in a background harbouring an additional chromosomal copy of the gene encoding the RNase HI (*rnhA*)  
 467 under the control of the arabinose promoter, either in the absence (red bars) or the presence (white bars) of arabinose. Error  
 468 bars represent mean  $\pm$  standard deviation of independent biological replicates ( $n=3$ ). N.S. non-significant; \* $P < 0.05$ ; \*\* $P <$   
 469  $0.01$ ; \*\*\* $P < 0.001$ ; \*\*\*\* $P < 0.0001$  (two-tailed Student's  $t$  test).



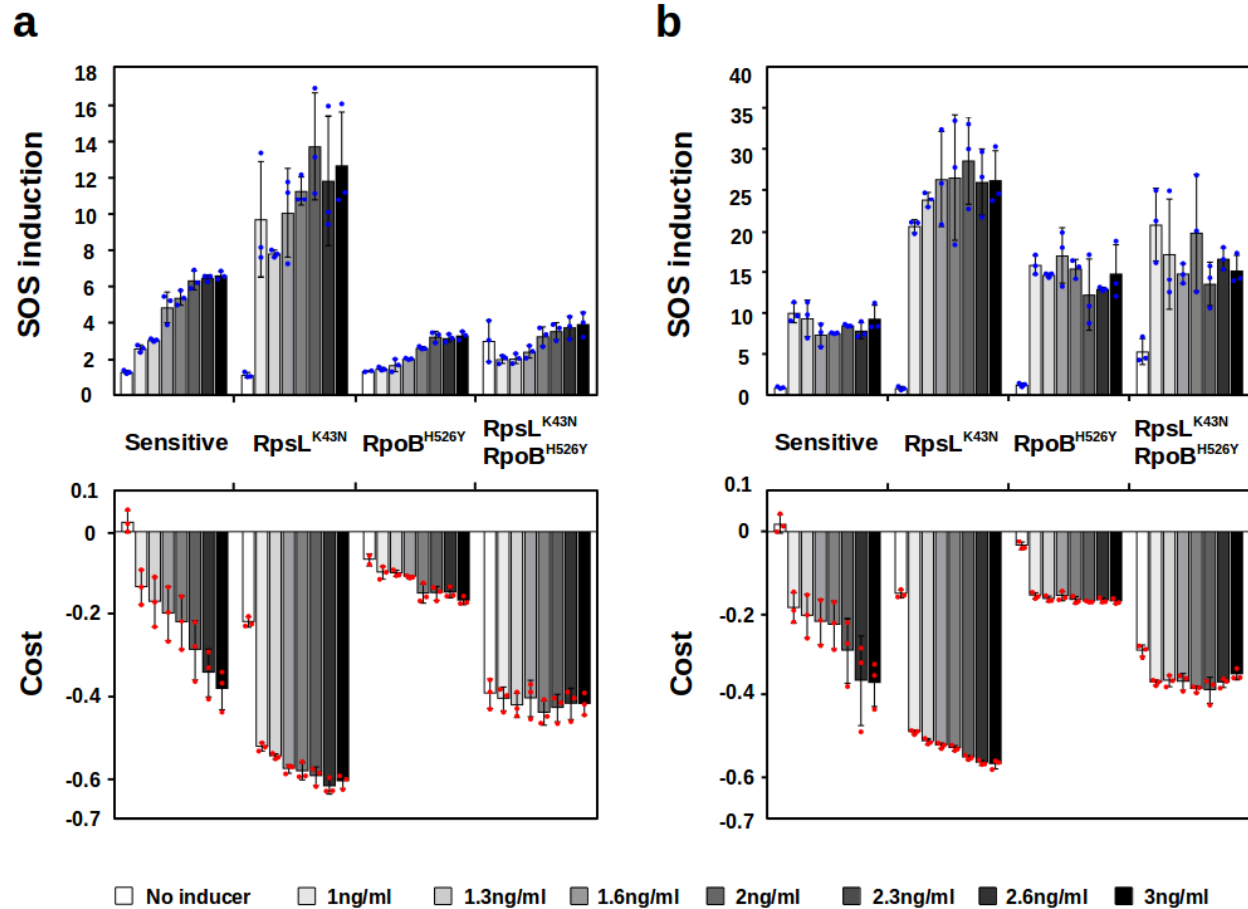

470 **Extended Data Figure 6. Strong overproduction of RNase HI worsen both cost and SOS induction in all the**  
471 **backgrounds.** Fold change in SOS induction (top) and selection coefficient per generation, representing the fitness cost  
472 (bottom), of sensitive bacteria (left), two single resistant mutants (center) and the double mutant resulting from combining  
473 these two alleles (right) at 4h (a) or 24h (b) in a background harbouring a plasmid carrying a copy of the RNase HI gene  
474 (*rnhA*) under the control of the a promoter inducible by anhydrotetracycline, either in the absence (blue/red bars) or the  
475 presence of different concentrations of the inducer (grayscale, from white to black bars). The dashed line indicates no  
476 cost/SOS induction. Error bars represent mean  $\pm$  standard deviation of independent biological replicates ( $n \geq 2$ ). N.S. non-  
477 significant; \* $P < 0.05$ ; \*\* $P < 0.01$ ; \*\*\* $P < 0.001$ ; \*\*\*\* $P < 0.0001$  (two-tailed Student's *t* test).

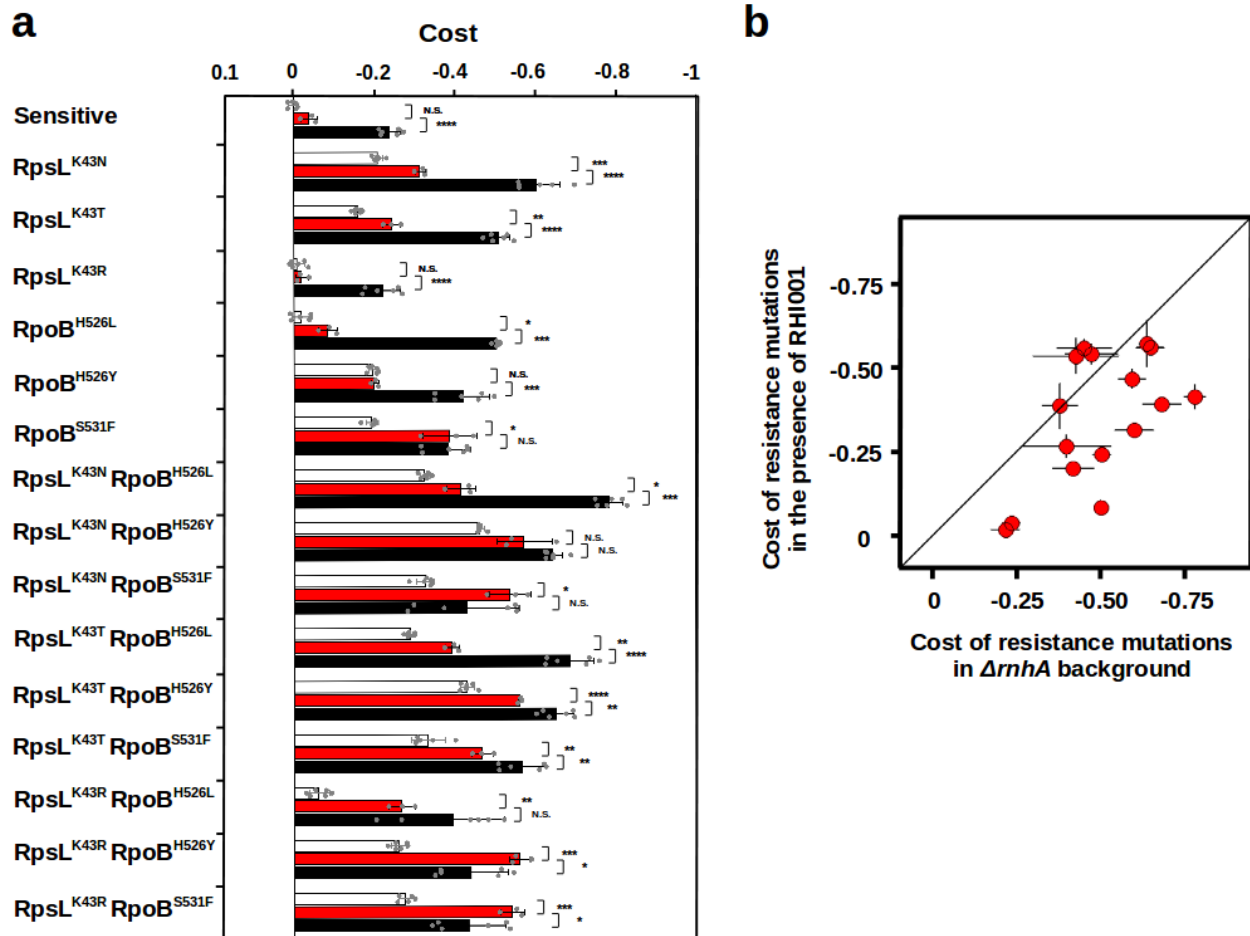

478 **Extended Data Figure 7. Chemical inhibition RNase HI cause an increase in the fitness cost of resistant bacteria. a.**  
479 Selection coefficient, representing the fitness cost of sensitive bacteria and different single and double resistant strains in the  
480 presence of the RNase HI inhibitor RHI001 (red bars). The corresponding values in the absence of the inhibitor (data from  
481 the experiments shown in Figure 1) or in a  $\Delta rn h A$  background (data from the experiments shown in Figures 3A and  
482 Extended Data Figure 4) are represented as white and black bars, respectively, for comparison. The dashed line indicates no  
483 cost. Error bars represent mean  $\pm$  standard deviation ( $n=3$ ). N.S. non-significant; \* $P < 0.05$ ; \*\* $P < 0.01$ ; \*\*\* $P < 0.001$ ;  
484 \*\*\*\* $P < 0.0001$  (two-tailed Student's  $t$  test). **b.** Correlation between the fitness cost of resistance mutations in the presence  
485 of the RNase HI inhibitor (y axis) or in the  $\Delta rn h A$  background (x axis). The black line represents the linear regression if the  
486 costs were identical. The values corresponding to the presence of RHI001 and the  $\Delta rn h A$  background are those shown in  
487 panel a and Extended Data Figure 4, respectively. Error bars represent mean  $\pm$  standard deviation of independent biological  
488 replicates ( $n \geq 3$ ).

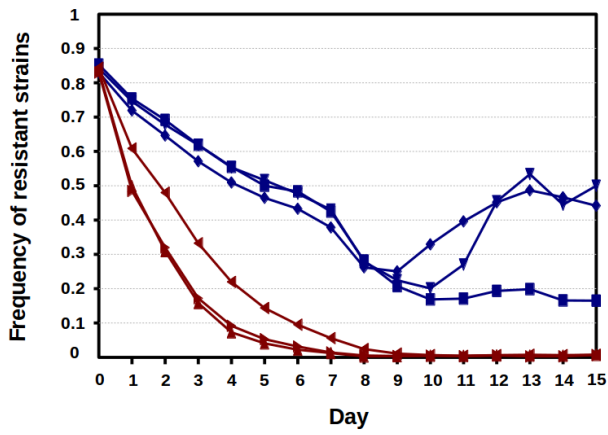

**Extended Data Figure 8. Lack of RNase HI favours outcompetition of resistant mutants by sensitive bacteria.**

Frequency of single resistant mutants during three independent long-term competitions against sensitive bacteria either in a genetic background including RNase HI (blue lines) or in a  $\Delta rnhA$  background (red lines), imposing a mild bottleneck (1:50 dilutions).

489  
490  
491  
492  
493  
494  
495  
496  
497  
498  
499  
500  
501  
502  
503  
504  
505  
506  
507  
508  
509  
510  
511  
512  
513  
514  
515  
516

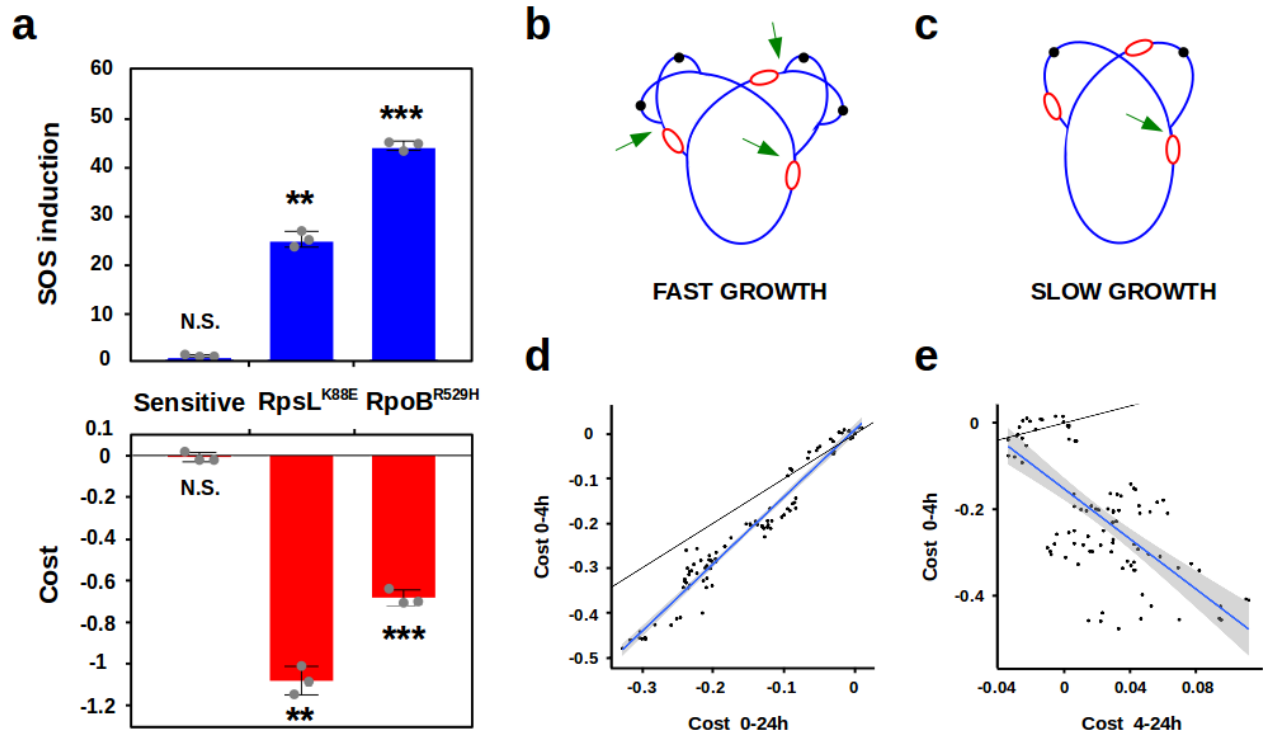

517 **Extended Data Figure 9. a. Costly single mutants show increased SOS induction.** Fold change in SOS induction (blue  
518 bars) and selection coefficient per generation, representing the fitness cost (red bars), of sensitive bacteria (left) and two  
519 costly single resistant mutants (center and right). Error bars represent mean  $\pm$  standard deviation of independent biological  
520 replicates (n=3). N.S. non-significant; \* $P < 0.05$ ; \*\* $P < 0.01$ ; \*\*\* $P < 0.001$ ; \*\*\*\* $P < 0.0001$  (two-tailed Student's  $t$  test).  
521 **Costs are expressed during fast growth.** Schematic representation of multi-fork DNA replication of *E. coli* during fast  
522 growth (b) or slow growth (c). Black dots represent the origin of replication, and red lines represent transcription forks;  
523 green arrows mark regions of potential conflicts between replication and transcription forks. **d.** Correlation between the  
524 fitness cost between time 0 and 4h (y axis) and the fitness cost between time 0 and 24h (y axis), in LB broth (data from the  
525 experiments shown in Figure 1). The black line represents the linear regression if the costs were identical. The blue line  
526 represents the linear regression line, and the grey area represents the 95% confidence interval. **e.** Correlation between the  
527 fitness cost between time 0 and 4h (y axis) and the fitness cost between time 4h and 24h (y axis), in LB broth (data from the  
528 experiments shown in Figure 1). The black line represents the linear regression if the costs were identical. The blue line  
529 represents the linear regression line, and the grey area represents the 95% confidence interval.
