1 **DNA breaks are key contributors to the cost of antibiotic resistance**

2

3 Roberto Balbontín<sup>\*, 1, 2</sup> and Isabel Gordo<sup>\*, 1</sup>

5 <sup>1</sup> Instituto Gulbenkian de Ciência; Oeiras, 2780-156; Portugal

6

7 <sup>2</sup>Lead Contact

8

9 \* Correspondence: [rbalbontin@igc.gulbenkian.pt](mailto:rbalbontin@igc.gulbenkian.pt), [igordo@igc.gulbenkian.pt](mailto:igordo@igc.gulbenkian.pt)

10

11

12

13

14

15

16

17

18

19

20

21

22

23 **Summary**

24

25 **Antibiotic resistance often causes a fitness cost to bacteria in the absence of the drug. The cost is**  
26 **the main determinant of the prevalence of resistances upon reducing antibiotics use.**  
27 **Understanding its causes is considered the Holy Grail in the antibiotic resistance field. We show**  
28 **that most of the variation in the cost of resistances common in pathogens can be explained by**  
29 **DNA breaks, a previously unsuspected cause. We demonstrate that the cost can be manipulated**  
30 **by targeting the RNase responsible for degrading R-loops, which cause DNA breaks. Indeed, lack**  
31 **of RNase HI drives resistant clones to extinction in populations with high initial frequency of**  
32 **resistance. Thus, RNase HI provides a promising target for antimicrobials specific against**  
33 **resistant bacteria, which we validate using a repurposed drug. These results show previously**  
34 **unknown effects of resistance on bacterial physiology and provide a framework for the**  
35 **development of new strategies against antibiotic resistance.**

36

37 **Keywords**

38

39 antibiotic resistance; fitness cost; DNA breaks; RNase HI targeting; repurposed drug.

40

41

42

43

## 44 **Introduction**

45

46 Antibiotic resistance entails a large human and economic burden worldwide ([Global](#)  
47 [antimicrobial resistance surveillance system \(GLASS\) report: Early implementation 2017-2018.](#)  
48 [Geneva: World Health Organization. 2018](#)). Its maintenance and spread in bacterial populations  
49 depend on the rate at which resistance is acquired and on its effect on bacterial fitness. This effect is  
50 typically deleterious, resulting in the so-called cost of resistance. The cost of resistance is influenced by  
51 the environment, by interactions between the resistances and the genetic background in which they  
52 appear (epistasis), and by subsequent acquisition of mutations compensating for fitness defects  
53 (compensatory evolution) ([Durão, Balbontín, & Gordo, 2018](#)). Importantly, the magnitude of the cost is  
54 the main biological parameter influencing the fate of resistances upon reducing antibiotic use ([Dan I.](#)  
55 [Andersson & Hughes, 2010](#)). Despite its importance, the causes of the cost are far from being  
56 completely understood ([Vogwill & MacLean, 2015](#)), and the identification of these causes has become  
57 the “Holy Grail” in the antibiotic resistance field.

58

59 Resistance mutations often map to genes encoding proteins targeted by antibiotics. These target  
60 proteins are typically involved in essential functions, such as transcription, translation, DNA replication  
61 or cell wall biosynthesis. Resistance mutations cause alterations in the structure of the target protein,  
62 rendering it insensitive to the drug, but often adversely affecting its function ([Andersson & Levin,](#)  
63 [1999, Andersson & Hughes, 2010, Durão, Balbontín, & Gordo, 2018](#)). These pleiotropic effects hold  
64 the key to manipulating resistance levels in bacterial populations ([Dan I. Andersson & Hughes, 2010](#)).

65 Rifampicin and streptomycin resistance mutations ( $Rif^R$  and  $Str^R$ ), common in pathogenic bacteria, map  
66 to the genes *rpoB* and *rpsL*, encoding the  $\beta'$  subunit of the RNA polymerase and the 30S ribosomal  
67 subunit protein S12, respectively.  $Rif^R$  and  $Str^R$  mutations are representative examples of resistances to  
68 antibiotics targeting transcription and translation, respectively.  $Rif^R$  mutations show different costs ([Jin](#)  
69 [& Gross, 1989](#), [Reynolds, 2000](#)), and these are commonly attributed to alterations in the rates of  
70 transcription initiation, elongation, slippage or termination ([Guarente & Beckwith, 1978](#), [Das, Merrill,](#)  
71 [& Adhya, 1978](#), [Yanofsky & Horn, 1981](#), [Gowrishankar & Pittard, 1982](#), [Fisher & Yanofsky, 1983](#),  
72 [Hammer, Jensen, Poulsen, Oppenheim, & Gottesman, 1987](#), [Jin, Walter, & Gross, 1988](#), [Jin \*et al.\*,](#)  
73 [1988](#), [Jin & Gross, 1989](#), [Jin & Gross, 1991](#), [Zhou & Jin, 1997](#), [Zhou & Jin, 1998](#), [Reynolds, 2000](#),  
74 [Zhou \*et al.\*, 2013](#)). Likewise, most  $Str^R$  mutations also cause a cost ([Ruusala, Andersson, Ehrenberg, &](#)  
75 [Kurland, 1984](#), [Schrag & Perrot, 1996](#), [Paulander, Maisnier-Patin, & Andersson, 2009](#)), which is  
76 currently interpreted via the effects of these mutations on translation fidelity and processivity ([Gorini &](#)  
77 [Kataja, 1964](#), [Gartner & Orias, 1966](#), [Ozaki, Mizushima, & Nomura, 1969](#), [Birge & Kurland, 1969](#),  
78 [Galas & Branscomb, 1976](#), [McMahon & Landau, 1982](#), [Bohman, Ruusala, Jelenc, & Kurland, 1984](#),  
79 [Dong & Kurland, 1995](#), [Schrag & Perrot, 1996](#), [Paulander, Maisnier-Patin, & Andersson, 2009](#)). Thus,  
80 at present, the costs of  $Rif^R$  and  $Str^R$  mutations are thought to be caused by defects in protein synthesis,  
81 either at a global cellular level ([Applebee, Herrgård, & Palsson, 2008](#), [Hall, 2013](#), [Qi, Preston, &](#)  
82 [MacLean, 2014](#)) or limited to specific functions or regulons ([Zhou & Jin, 1998](#), [Paulander, Maisnier-](#)  
83 [Patin, & Andersson, 2009](#), [Ochi & Hosaka, 2013](#), [Pelchovich \*et al.\*, 2014](#)).

84

85 Motivated by the principle that compensatory evolution would be capable of shedding light on  
86 the evolutionary cause of the cost of resistance, we recently showed that the fitness cost of double  
87 resistance (Rif<sup>R</sup> Str<sup>R</sup>) can be reduced via overexpression of *nusG* or *nusE* (Moura de Sousa, Balbontín,  
88 Durão, & Gordo, 2017), which encode the proteins that physically connect the RNA polymerase and  
89 the ribosome (Burmamann *et al.*, 2010). This suggests that the reduction of the cost can be achieved by  
90 reinforcing the coupling between transcription and translation, besides the already known partial  
91 recovery in protein biosynthesis (Andersson & Hughes, 2010). Coupling between transcription and  
92 translation is known to prevent spontaneous backtracking of the RNA polymerase (Herbert *et al.*, 2010,  
93 Proshkin, Rahmouni, Mironov, & Nudler, 2010, Kohler, Mooney, Mills, Landick, & Cramer, 2017,  
94 Saxena *et al.*, 2018), which can ultimately cause double-strand DNA breaks (Dutta *et al.*, 2011). This  
95 led us to hypothesize that cells carrying different Rif<sup>R</sup> and Str<sup>R</sup> mutations have higher number of DNA  
96 breaks, and it is the DNA breaks that drive their cost.

97

98 In this study, we show that DNA breaks caused by resistance mutations are major contributors to  
99 their fitness cost, explaining 73% of its variation across resistant genotypes. The involvement of R-  
100 loops in the generation of DNA breaks allowed us to identify RNase HI as an important determinant of  
101 the cost of resistance, which we validate using a repurposed drug. We further show that targeting  
102 RNase HI is a plausible strategy for the effective elimination of resistant bacteria, as lack of RNase HI  
103 favors extinction of resistant clones when competing against sensitive bacteria, abolishing  
104 compensatory evolution.

105

## 106 **Results**

107

### 108 DNA breaks explain variation in the fitness cost of resistance

109

110 In order to test if Rif<sup>R</sup> and Str<sup>R</sup> mutations generate DNA breaks, and whether DNA breaks drive  
111 the cost of resistance, we simultaneously measured competitive fitness and activation of the SOS  
112 response (Maslowska, Makiela-Dzvenska, & Fijalkowska, 2019), a well-known proxy for the  
113 occurrence of DNA breaks (Quillardet, Huisman, D'Ari, & Hofnung, 1982). We carried out these  
114 assays in sensitive *E. coli*, Str<sup>R</sup> strains (RpsL<sup>K43N</sup>, RpsL<sup>K43T</sup>, and RpsL<sup>K43R</sup>), Rif<sup>R</sup> strains (RpoB<sup>H526L</sup>,  
115 RpoB<sup>H526Y</sup>, and RpoB<sup>S531F</sup>), and double resistant mutants carrying the nine possible combinations of  
116 these resistance alleles. Remarkably, fourteen out of the fifteen resistant strains show increased SOS  
117 activation (Figure 1A), demonstrating that resistance mutations indeed cause DNA breaks. Moreover,  
118 the SOS induction strongly correlates with the cost of resistance, explaining 73% of its variation  
119 (Figure 1B). This suggests that DNA breaks are key contributors to the cost of resistance. To  
120 independently confirm the occurrence of DNA breaks in resistant bacteria, we used a system which  
121 permits direct visualization of double-stranded DNA ends by fluorescence microscopy (Shee *et al.*,  
122 2013). We combined this system with the SOS reporter, and analyzed a subset of resistant mutants and  
123 sensitive bacteria. As expected, this corroborated that resistance mutations indeed cause increased  
124 number of DNA breaks (Table 1, Figure S1). We then asked if resistance mutations involving a  
125 different mechanism which could lead to perturbations of transcription-translation coupling also  
126 generate DNA breaks. The commonly used antibiotic erythromycin targets the 50S ribosomal subunit,

127 affecting translation and its coupling with transcription ([Sedlyarova et al., 2017](#)). Erythromycin  
128 resistance mutations ( $\text{Erm}^{\text{R}}$ ) mapping to the genes *rplD* and *rplV* (encoding the 50S ribosomal subunit  
129 proteins L4 and L22, respectively) are known to reduce translation elongation rate ([Chittum &](#)  
130 [Champney, 1994](#), [Zaman, Fitzpatrick, Lindahl, & Zengel, 2007](#)), likely affecting transcription-  
131 translation coupling. We isolated  $\text{Erm}^{\text{R}}$  clones carrying either  $\text{RplD}^{\text{G66R}}$  or  $\text{RplV}^{\Delta(82-84)}$  mutations and  
132 found that both mutants show increased SOS ([Figure 1C](#)), demonstrating that other resistance  
133 mutations, with a different mechanistic basis but affecting the same process (transcription-translation  
134 coupling) also cause DNA breaks.

135

136 The cost of resistance can be very reduced when bacteria grow in glucose as the sole carbon  
137 source, and specific  $\text{Rif}^{\text{R}}$  and/or  $\text{Str}^{\text{R}}$  alleles show no significant cost in such minimal medium  
138 ([Paulander, Maisnier-Patin, & Andersson, 2009](#), [Trindade, Sousa, & Gordo, 2012](#), [Durão, Trindade,](#)  
139 [Sousa, & Gordo, 2015](#)). We therefore reasoned that, if DNA breaks are an important cause of the cost,  
140 they should be reduced in an environment where the costs are smaller. In agreement with our  
141 hypothesis, resistant mutants show reduced DNA breaks in minimal medium ([Figure 2A](#)), leading to  
142 and a weaker correlation between DNA breaks and the cost ([Figure 2B](#)). This further validates DNA  
143 breaks as a key predictor of the fitness cost of antibiotic resistance.

144

145 Compensatory evolution cause reduction of DNA breaks

146

147 We then hypothesized that, if DNA breaks are major drivers of the fitness cost of resistance,  
148 compensatory evolution of resistant strains should result in a reduction of DNA breaks. To test this, we  
149 compared the cost and SOS induction in the RpsL<sup>K43T</sup> RpoB<sup>H526Y</sup> double mutant and in an isogenic strain  
150 additionally carrying the most prevalent compensatory mutation found in our previous study:  
151 RpoC<sup>Q1126K</sup> (Moura de Sousa *et al.*, 2017). As hypothesized, both cost and SOS induction are greatly  
152 reduced in the compensated strain (Figure 3A), confirming that DNA breaks are targeted by  
153 compensatory evolution. In order to test if this is general, we analyzed nine compensated clones from  
154 three independent populations of the RpsL<sup>K43T</sup> RpoB<sup>H526Y</sup> double mutant propagated for fifteen days in  
155 the absence of antibiotics. As expected, the costs are smaller in the evolved strains and, as  
156 hypothesized, all the nine compensated clones show decreased SOS induction compared to their  
157 resistant ancestor (Figure 3B). This demonstrates that compensatory evolution widely targets  
158 mechanisms that reduce DNA breaks and further reinforces the notion that DNA breaks are major  
159 contributors to the cost of antibiotic resistance.

160

### 161 RNAse HI strongly influences the fitness of resistant bacteria

162

163 Transcription-translation uncoupling leads to increased formation of R-loops, which cause DNA  
164 breaks (Dutta *et al.*, 2011). We thus reasoned that the increased number of DNA breaks in the resistant  
165 mutants could also involve R-loops. In this scenario, deleting RNase HI, which specifically degrades  
166 R-loops (Tadokoro & Kanaya, 2009), should lead to increased DNA breaks and greater costs of Rif<sup>R</sup>  
167 and Str<sup>R</sup>. Accordingly, both DNA breaks and the cost of resistance are greatly exacerbated in the  $\Delta$ rnhA



168 background (Figure 4A, Table 1, Figure S2, Figure S3A). Conversely, mild overproduction of RNase  
169 HI can ameliorate both phenotypes in a subset of mutants (Figure S4); however, strong overproduction  
170 is toxic for the cell (Stockum, Lloyd, & Rudolph, 2012, Wimberly *et al.*, 2013), irrespectively of its  
171 genotype (Figure S5). These results confirm the involvement of R-loops in the uncoupling-mediated  
172 production of DNA breaks caused by resistance and suggest that RNase HI can be a target for  
173 manipulating the fitness of resistant strains.

174

#### 175 RNase HI can serve as a target specific against resistant bacteria

176

177 We then asked whether targeting RNase HI function could be used to select specifically against  
178 resistant bacteria in polymorphic populations with high frequency of resistance. RNase HI inhibitors  
179 are currently studied as antiretrovirals (Tramontano, Corona, & Menendez-Arias, 2019). A  
180 commercially available one, RHI001, has been shown to inhibit the activity of purified *E. coli* RNase  
181 HI protein *in vitro* (Kim *et al.*, 2013). In competitions between sensitive and resistant bacteria, we  
182 observed that addition of RHI001 to the medium increases the cost of most resistant mutants (Figure  
183 4B), on average by 14%. RHI001 also reduces fitness of double resistant bacteria more than that of  
184 sensitive bacteria in the absence of competition (Figures S3B and S3C). Chemical inhibition was not as  
185 effective as genetic removal (which increases cost on average by 28%) (Figure 4C and D), as may be  
186 expected, since stability, diffusibility across the bacterial envelope, pharmacokinetics and  
187 pharmacodynamics of RHI001 *in vivo* are unknown, and potentially suboptimal. Nevertheless, these  
188 results suggest that inhibiting RNase HI may be a plausible strategy to select specifically against

189 resistant strains coexisting with sensitive bacteria, as long as resistant strains fail to evolve adaptations  
190 that abrogate their extinction. In order to test this hypothesis, we propagated a mixture of sensitive  
191 bacteria (CFP-labeled) competing against a pool of five single resistant mutants (YFP-labeled  
192 RpsL<sup>K43N</sup>, RpsL<sup>K43T</sup>, RpoB<sup>H526L</sup>, RpoB<sup>H526Y</sup>, and RpoB<sup>S531F</sup>) during 15 days, in the absence of antibiotics.  
193 We studied the frequency dynamics of resistant clones under both strong bottlenecks (1:1500  
194 dilutions), where new adaptive mutations are less likely to spread, and weak bottlenecks (1:50  
195 dilutions), where propagation of adapted clones is more probable. In parallel, we performed identical  
196 propagations, but in which all strains lack RNase HI, as a proxy for optimal inhibition of RNase HI  
197 function. We observed that, in the presence of RNase HI, sensitive bacteria initially outcompete  
198 resistant clones but, as the propagation progresses, resistant bacteria increase in frequency - likely due  
199 to compensatory evolution - finally reaching coexistence ([Figure 5A](#), blue lines). Remarkably, in the  
200 propagations of strains lacking RNase HI, resistant bacteria were completely outcompeted and went  
201 extinct by day seven ([Figure 5A](#), red lines), even under mild bottlenecks ([Figure 5B](#)). Altogether, these  
202 results show that targeting RNase HI is a promising strategy to selectively eliminate resistant bacteria.

203

## 204 **Discussion**

205

206 We show that mutations known to affect protein synthesis generate DNA breaks, which explain  
207 73% of the variation in their cost ([Figure 1](#), [Table 1](#), [Figure S1](#)). Compensatory evolution indicates that  
208 these resistances cause uncoupling between transcription and translation ([Moura de Sousa \*et al.\*, 2017](#)),  
209 which can result in DNA breaks ([Dutta, Shatalin, Epshtein, Gottesman, & Nudler, 2011](#)). Indeed, we

210 show that the RpsL<sup>K43N</sup> RpoB<sup>H526Y</sup> and RpsL<sup>K43T</sup> RpoB<sup>H526Y</sup> double mutants, which combine alleles that  
211 cause increased transcription elongation rate (Fisher & Yanofsky, 1983) and decreased translation rate  
212 (Schrag & Perrot, 1996, Hosaka *et al.*, 2004), show the highest costs and DNA breaks (Figure 1).  
213 Curiously, inhibition of translation has been shown to alleviate the cost of Rif<sup>R</sup> mutations in  
214 *Pseudomonas aeruginosa* (Alex R. Hall, Iles, & MacLean, 2011). In light of the results presented here,  
215 this observation is compatible with a scenario in which Rif<sup>R</sup> mutations cause a perturbation of  
216 transcription-translation coupling by virtue of reduced RNA polymerase processivity, and translation  
217 inhibitors promote re-coupling by decreasing ribosomal activity. In agreement with the notion of single  
218 resistance mutations causing significant uncoupling, single Rif<sup>R</sup> or Str<sup>R</sup> mutations with high cost  
219 (Trindade *et al.*, 2009) cause a strong induction of the SOS response (Figure S6A). We also showed  
220 that RNase HI is a key determinant of the fitness of resistant mutants (Figure 4, Table 1, Figure S3A,  
221 Figure S4). Interestingly, transcription-translation uncoupling caused by chemical inhibition of  
222 translation can generate R-loops (Broccoli *et al.*, 2004, Dutta, Shatalin, Epshtein, Gottesman, &  
223 Nudler, 2011, Negro *et al.*, 2019). Thus, perturbations of the coupling between transcription and  
224 translation increases the requirement of RNase HI function by bacteria. This opens the possibility to  
225 designing novel therapeutic interventions by combining drugs targeting transcription or translation with  
226 RNase HI inhibitors in order to increase DNA breaks and costs of resistance, therefore enhancing the  
227 effectiveness of antimicrobial treatments.

228

229 DNA breaks induced by transcription-translation uncoupling involve increased replication-  
230 transcription conflicts (Dutta *et al.*, 2011), which have been shown to cause both R-loops (Lang *et al.*,

231 2017) and DNA breaks (Merrikh *et al.*, 2012). We observed more DNA breaks in rich than in minimal  
232 media (Figure 1A, Figure 2A). This might be linked to the fact that replication-transcription conflicts  
233 are maximized during fast replication (Merrikh, Machón, Grainger, Grossman, & Soutanas, 2011), and  
234 bacteria replicate faster in rich than in minimal media (C. H. Wang & Koch, 1978) (Figure S6B).  
235 Supporting this notion, we observed that, in rich medium, the costs are detected in the first 4 hours,  
236 when cells are growing exponentially, while resistant bacteria can even show advantage when growth  
237 slows down (Figure S6C). Consistent with this observation, resistant mutants have been shown to  
238 outcompete sensitive bacteria in aging colonies (Wrande, Roth, & Hughes, 2008, Katz & Hershberg,  
239 2013). Another interesting fact is that stable DNA replication (initiation of DNA replication at sites  
240 different from *OriC*) can be induced by lack of RNase HI or conditions that activate SOS (Kogoma,  
241 1997). Thus, Rif<sup>R</sup> and Str<sup>R</sup> mutations, which induce SOS, could favor replication-transcription conflicts  
242 via induction of stable DNA replication. This can generate a feed-forward loop of synergistic  
243 deleterious effects, which may be further enhanced by the downregulation of *rnhA* caused by the  
244 induction of the SOS response (Quiñones, Kücherer, Piechocki, & Messer, 1987). This detrimental  
245 runaway loop and the environmental effects on the cost described above could potentially be exploited  
246 therapeutically, via concurrent chemical and dietary treatments designed to maximize the cost of  
247 resistance.

248

249 We revealed RNase HI as a promising target specific against resistant bacteria (Figure 4), and  
250 showed that lack of RNase HI favors extinction of resistant clones, preventing compensatory evolution  
251 (Figure 5). This is specially important for resistances mediated by mutations (Hershberg, 2017) or for

252 pathogens that acquire antibiotic resistance exclusively through mutation, such as *Mycobacterium*  
253 *tuberculosis*, which often carries Rif<sup>R</sup> and Str<sup>R</sup> mutations ([Almeida Da Silva & Palomino, 2011](#)).  
254 Interestingly, RNase HI has been proposed as an antimycobacterial target due to its essentiality in  
255 *Mycobacterium smegmatis* ([Minias et al., 2015](#), [Gupta, Chatterjee, Glickman, & Shuman, 2017](#)). The  
256 results presented here support the plausibility of this strategy.

257

258 An understanding of the determinants of maintenance and dissemination of antibiotic resistance,  
259 such as its cost, is urgently needed ([Global antimicrobial resistance surveillance system \(GLASS\)  
260 report: Early implementation 2017-2018. Geneva: World Health Organization, 2018](#)). We show that  
261 DNA breaks drive the cost of resistance and reveal RNase HI as a promising antimicrobial target  
262 specific against resistant bacteria, which we validated using a repurposed drug. Overall, our results  
263 uncover important effects of resistances on bacterial physiology and demonstrate the plausibility of  
264 exploiting these effects to develop novel strategies against antibiotic resistance.

265

## 266 **Acknowledgments**

267

268 The authors thank Professor Susan M. Rosenberg and Dr. Christian J. Rudolph for kindly  
269 providing bacterial strains, the Flow Cytometry and Advanced Imaging facilities of Instituto  
270 Gulbenkian de Ciência for technical assistance, Miguel Godinho for useful discussions, and Karina  
271 Xavier, Leonardo Gastón Guilgur, Pol Nadal Jiménez and the members of the Gordo and Xavier labs  
272 for critically reading earlier versions of this manuscript. This work was funded by the the Marie

273 Sklodowska-Curie Actions (MSCA) with the fellowship 746690-ResistEpist-H2020-MSCA-IF-  
274 2016/H2020-MSCA-IF-2016, to R.B., and partially supported by ONEIDA project (LISBOA-01-0145-  
275 FEDER-016417) co-funded by FEEI - "Fundos Europeus Estruturais e de Investimento" from  
276 "Programa Operacional Regional Lisboa 2020", and by national funds from "Fundação para a Ciência  
277 e a Tecnologia" (FCT), to I.G. R.B. was also supported by the FCT with the fellowship  
278 SFRH/BDP/109517/2015. The authors declare no conflicts of interest.

279

### 280 **Author contributions**

281

282 R.B: conceptualization, formal analysis, funding acquisition, investigation, methodology,  
283 visualization, writing – original draft. I.G: conceptualization, formal analysis, funding acquisition,  
284 methodology, project administration, resources, supervision, writing – review & editing.

285

### 286 **Declaration of interests**

287

288 The authors declare no competing interests.

289

### 290 **Data availability**

291

292 All the strains used ([Data S1](#)) are available via Material Transfer Agreement (MTA). The raw  
293 data of the experiments shown in all figures and the table are available as Additional Information in

294 [Data S2](#). The images analyzed to obtain the data shown in [Table 1](#), and those used in [Figures S1](#) and [S2](#)  
295 are available in the public data repository Zenodo (DOI: 10.5281/zenodo.3381746).

296

## 297 **Materials and methods**

298

### 299 Bacterial strains, media and growth conditions

300

301 All the strains used in this study ([Data S1](#)) derive from strains RB266, RB323 or RB324, which  
302 are derivatives of *E. coli* K12 MG1655 ([Blattner et al., 1997](#)). Fluorescently labeled strains harbor a  
303 copy of either YFP or CFP under the control of the lac-regulated promoter  $P_{LacO-1}$  inserted either in the  
304 *yzgL* pseudogene locus or in the *galK* gene, a deletion comprising the entire *lac* operon (to make  
305 constitutive the expression of the fluorescent proteins), and the SOS reporter construction  $P_{sulA}$ -  
306 *mCherry* inserted in the *ysaCD* pseudogene locus. The SOS reporter fusion was constructed by  
307 replacing a *tetA-sacB* selectable/counterselectable marker ([Li, Thomason, Sawitzke, Costantino, &](#)  
308 [Court, 2013](#)) located upstream from a *mCherry-FRT-aph-FRT* cassette previously inserted in the  
309 *ysaCD* locus by the regulatory regions (150bp upstream from the translation initiation site) of the SOS-  
310 regulated gene *sulA*. Resistant mutants additionally carry different chromosomal alleles conferring  
311 antibiotic resistance/s. The fluorescent constructions were generated by Lambda-Red recombineering  
312 ([Murphy, Campellone, & Poteete, 2000](#), [Yu et al., 2000](#), [Datsenko & Wanner, 2000](#)), followed by  
313 transference to a clean background by P1 transduction ([Lennox, 1955](#)), and subsequent transduction of  
314 the resistance alleles. The clean deletion of *rnhA* was constructed by markerless recombineering using

315 a *tetR-P<sub>tet</sub>-ccdB-cat* selection/countersélection cassette as described in Figueroa-Bossi & Bossi  
316 ([Figueroa-Bossi & Bossi, 2015](#)), and subsequent transfer of the markerless deletion to a clean  
317 background by P1 transduction, using as recipient an isogenic strain carrying a deletion of the nearby  
318 gene *proB*, which causes proline auxotrophy, and selecting for growth in minimal medium. The  
319 presence of each construction/mutation was assessed by PCR-mediated amplification of the  
320 corresponding region and Sanger sequencing. The Gam-GFP construction ([Shee et al., 2013](#)) was  
321 generously contributed by Professor Susan M. Rosenberg. The chromosomal construction comprising a  
322 copy of the *rnhA* gene under the control of a promoter inducible by arabinose ([Stockum et al., 2012](#))  
323 was kindly donated by Dr. Christian J. Rudolph. Derivatives of these strains carrying the *P<sub>sulA</sub>-mCherry*  
324 and different resistance mutations were constructed by P1 transduction. The plasmid pRB-5 (carrying  
325 the *rnhA* gene under the control of a promoter inducible by anhydrotetracycline) was constructed by  
326 PCR amplification of the vector pZS\*11 ([Subramaniam, Pan, & Cluzel, 2013](#)) and the construction  
327 *tetR-P<sub>LtetO-1</sub>-rnhA* from strain RB1207, subsequent restriction with AatII and HindIII enzymes, ligation  
328 and electroporation. The construction *tetR-P<sub>LtetO-1</sub>-rnhA* in strain RB1207 was made by Lambda-Red  
329 recombineering ([Murphy, Campellone, & Poteete, 2000](#), [Yu et al., 2000](#), [Datsenko & Wanner, 2000](#)),  
330 and selection/countersélection ([Li et al., 2013](#)), over a previous *P<sub>LtetO-1</sub>-sfGFP* construction ([Balbontín,](#)  
331 [Vlamakis, & Kolter, 2014](#)). Cultures were grown in either Lysogeny Broth (LB, Miller formulation)  
332 ([Bertani, 1951](#)) or M9 broth supplemented with 0.4% glucose ([Maniatis et al. Molecular cloning: A](#)  
333 [laboratory manual \(CSHL Press\)](#)), in round-bottom 96-well plates incubated at 37°C with shaking (700  
334 r.p.m.) in a Grant-bio PHMP-4 benchtop incubator, unless indicated otherwise. Solid medium was LB  
335 containing 1.5% agar, supplemented when necessary with antibiotics at the following concentrations:



336 rifampicin (100 µg/ml), streptomycin (100 µg/ml), ampicillin (100 µg/ml), erythromycin (150 µg/ml),  
337 kanamycin (100 µg/ml), chloramphenicol (25 µg/ml).

338

### 339 Competitive fitness/SOS induction assays

340

341 The relative fitness (selection coefficient per generation) of each YFP-tagged resistant strain  
342 carrying the SOS reporter was measured by competitive growth against an isogenic sensitive strain *E.*  
343 *coli* K12 MG1655 constitutively expressing CFP and also carrying the SOS reporter. The formula used  
344 to calculate the selection coefficient was  $s = \frac{\ln(NRf/NSf) - \ln(NRi/NSi)}{\ln(NSf/NSi)}$ , being ***NRi*** and  
345 ***NRf*** the initial and final number of resistant bacteria, and ***NSi*** and ***NSf*** the initial and final number of  
346 sensitive bacteria. The competitor strains were first streaked out of their respective frozen vials, then  
347 individual colonies were inoculated separately in medium without antibiotics and incubated overnight  
348 (approximately 16h); the next morning, the number of cells in each culture was measured by Flow  
349 Cytometry, and 10 µl of 1:1 mixtures of YFP and CFP bacteria were added to 140 µl of medium, at an  
350 initial number of approximately 10<sup>6</sup> cells. The initial and final frequencies of the strains were obtained  
351 by counting their cell numbers in the Flow Cytometer. Generation time was estimated from the  
352 doubling time of the reference strain (approximately five generations at 4h, and approximately eight  
353 generations at 24h), and the selection coefficient was determined as described above for each  
354 independent competition. The proportion of SOS-induced bacteria was quantified as the number of  
355 either YFP-tagged or CFP-labeled bacteria showing red fluorescence (from the *P<sub>sulA</sub>-mCherry* SOS

356 reporter fusion) above a threshold determined by the fluorescence levels of the control strains *lexA*  
357 (*ind-*) (constitutive repression of the SOS response) and  $\Delta$ *lexA* (constitutive activation of the SOS  
358 response) (Lin & Little, 1988). The data represented is the induction level of each mutant normalized  
359 with respect to the induction levels of the sensitive it is competing against. In the competitions  
360 including the RNase HI inhibitor 2-[[[3-Bromo-5-(2-furanyl)-7-(trifluoromethyl)pyrazolo[1,5-  
361 a]pyrimidin-2-yl]carbonyl]amino]-4,5,6,7-tetrahydro-benzo[b]thiophene-3-carboxylic acid ethyl ester  
362 (RHI001), the medium was supplemented with 500  $\mu$ M of RHI001 (Glxxx Laboratories Inc., catalog  
363 number GLXC-03982).

364

### 365 Flow Cytometry

366

367 A BD LSR Fortessa<sup>TM</sup> SORP flow cytometer was used to quantify bacteria, using a 96-well plate  
368 High-Throughput Sampler (HTS) and SPHERO fluorescent spheres (AccuCount 2.0  $\mu$ m blank  
369 particles), in order to accurately measure volumes. Bacterial numbers were calculated based on the  
370 counts of fluorescently labeled bacteria with respect the known number of beads added to a given  
371 volume. The instrument was equipped with a 488 nm laser used for scatter parameters and YFP  
372 detection, a 442 nm laser for CFP detection and a 561 nm laser for mCherry detection. Relative to  
373 optical configuration, CFP, YPF and mCherry were measured using bandpass filters in the range of  
374 470/20 nm, 540/30 nm and 630/75nm, respectively. The analyzer is also equipped with a forward  
375 scatter (FSC) detector in a photomultiplier tube (PMT) to detect bacteria. The samples were acquired  
376 using FACSDiVa (version 6.2) software, and analyzed using FlowJo (version X 10.0.7r2). All Flow

377 Cytometry experiments were performed at the Flow Cytometry Facility of Instituto Gulbenkian de  
378 Ciência, Oeiras, Portugal.

379

### 380 Selection for Erm<sup>R</sup> bacteria

381

382 Fifteen independent colonies of sensitive bacteria were separately inoculated in LB in a 96-well  
383 plate, incubated at at 37°C with shaking (700 r.p.m) for 7 hours, and 0.1ml of either independent  
384 culture was plated onto a LB agar plate supplemented with 150 µg/ml erythromycin, and incubated at  
385 37°C for 5 days (Erm<sup>R</sup> strains grow in the presence of erythromycin, albeit slowly). Colonies able to  
386 grow in these plates were streaked onto plates supplemented with 150 µg/ml erythromycin, in order to  
387 further assess their *bona fide* resistance, and the *rplD*, and *rplV* genes of the resistant clones were  
388 amplified by PCR and analyzed by Sanger sequencing.

389

### 390 Microscopy

391

392 Early exponential cultures were diluted into pre-warmed medium containing the inducer of the  
393 Gam-GFP construction (anhydrotetracycline, 25ng/ml) and incubated at 37°C with shaking (240 r.p.m.)  
394 for 3h, prior to imaging. Bacterial solutions were then placed onto 1% agarose (in 1X PBS) pads  
395 mounted in adhesive frames between the microscope slide and a coverglass. Images were acquired on  
396 an Applied Precision DeltavisionCORE system, mounted on an Olympus IX71 inverted microscope,

397 coupled to a Cascade II 1024x1024 EM-CCD camera, using an Olympus 100x 1.4NA Uplan SAPO Oil  
398 immersion objective, where GFP and mCherry were imaged with FITC (Ex: 475/28, EM: 528/38) and  
399 TRITC (Ex: 542/28, Em: 617/73) fluorescence filtersets, respectively, and DIC optics. Images were  
400 deconvoluted with Applied Precision's softWorx software, and prepared for presentation (cropping  
401 smaller fields to facilitate visualization, and false-coloring green and red fluorescent signals) using  
402 Fiji/ImageJ.

403

#### 404 Long-term propagations of polymorphic populations

405

406 The CFP-tagged sensitive (either WT or *ΔrnhA*) and the five YFP-labeled resistant bacterial  
407 (either RpsL<sup>K43N</sup>, RpsL<sup>K43T</sup>, RpoB<sup>H526L</sup>, RpoB<sup>H526Y</sup>, and RpoB<sup>S531F</sup> or *ΔrnhA* RpsL<sup>K43N</sup>, *ΔrnhA* RpsL<sup>K43T</sup>,  
408 *ΔrnhA* RpoB<sup>H526L</sup>, *ΔrnhA* RpoB<sup>H526Y</sup>, and *ΔrnhA* RpoB<sup>S531F</sup>) were streaked individually onto LB agar  
409 plates and incubated overnight at 37°C. The next day, three independent colonies from each strain were  
410 inoculated separately in LB broth (150 μl per well) in a 96-well plate and incubated overnight at 37°C  
411 with shaking (700 r.p.m). The next day, bacteria were quantified by Flow Cytometry, and 10 μl of  
412 1:1:1:1:1:1 mixtures of the sensitive and either resistant bacteria were added to 140 μl of medium, at a  
413 initial number of approximately 10<sup>6</sup> cells. The initial frequencies of the fluorescent strains were  
414 confirmed by Flow Cytometry. Every 24h, during 15 days, 10 μl of bacteria culture was diluted by a  
415 factor of 10<sup>-2</sup>, then transferred to 140 μl fresh LB and allowed to grow for additional 24h, reaching  
416 approximately 10<sup>9</sup> cells/ml. In parallel, cell numbers were counted using the Flow Cytometer, in order

417 to measure the frequency of each strain in the mixed population during the experiment, by collecting a  
418 sample (10  $\mu$ l) from the spent culture each day.

419

#### 420 Growth curves

421

422 YFP-tagged sensitive and RpsL<sup>K43N</sup> RpoB<sup>H526Y</sup> strains were streaked individually onto LB agar  
423 plates and incubated overnight at 37°C. The next day, three independent colonies from each strain were  
424 inoculated separately in LB broth (150  $\mu$ l per well) in a 96-well plate and incubated overnight at 37°C  
425 with shaking (700 r.p.m). The next day, bacteria were quantified by Flow Cytometry, and  
426 approximately  $5 \times 10^5$  bacteria were inoculated in 100-well plates containing LB broth supplemented  
427 with either 0.5% DMSO (the solvent of RHI001) or 50  $\mu$ M RHI001 (150  $\mu$ l per well), and incubated at  
428 37°C with continuous shaking (medium amplitude, duration 5s, 10s interval, and stopping 5s before  
429 each measurement) in a Bioscreen C (Oy Growth Curves Ab Ltd.) benchtop plate reader, measuring  
430 OD<sub>600</sub> every 30 minutes during 12h.

431

#### 432 Statistical analyses

433

434 All analyses were conducted using Libreoffice Calc version 5.4.1.2 ([www.libreoffice.org](http://www.libreoffice.org))  
435 software, R version 3.4.4 ([www.r-project.org](http://www.r-project.org)) software via RStudio version 1.1.442 interface  
436 ([www.rstudio.com](http://www.rstudio.com)) and GraphPad Prism version 7.04 ([www.graphpad.com](http://www.graphpad.com)). For each set of  
437 competitions ( $n \geq 3$ ), two-tailed unpaired Student's *t*-tests were used. For testing the association between

438 the fitness cost and the level of SOS induction, a linear regression of the  $s$  with the logarithm of the  
439 fold change in SOS induction of each resistant clone (with respect to the sensitive bacteria it is  
440 competing against in the same well), was used.

441

442 **Figures**

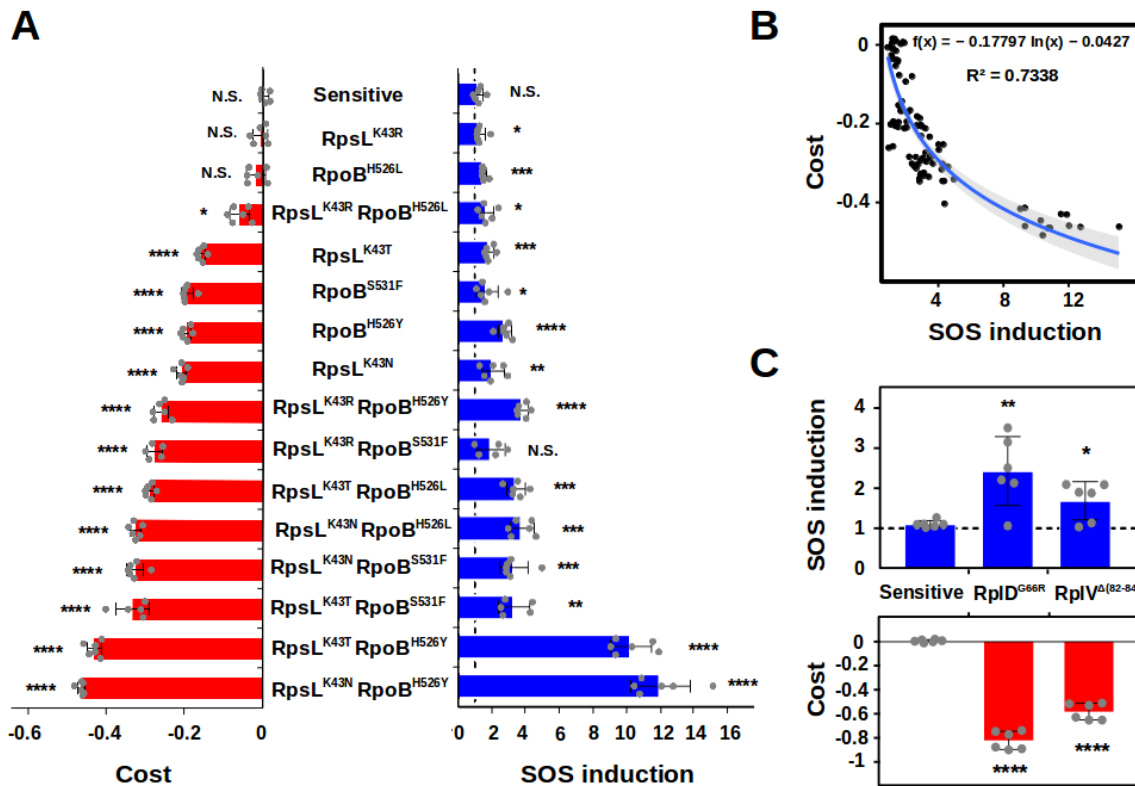

443 **Figure 1. DNA breaks explain variation in the fitness cost of resistance.** **A.** Fitness cost (red bars) and SOS  
444 induction (blue bars) of sensitive bacteria and Str<sup>R</sup> and Rif<sup>R</sup> mutants in LB broth at 4 hours. The strains are  
445 ordered from lower to higher fitness cost (top to bottom). The dashed line indicates no SOS induction. Error  
446 bars represent mean  $\pm$  standard deviation of independent biological replicates ( $n \geq 5$ ). N.S. non-significant; \* $P <$   
447 0.05; \*\* $P <$  0.01; \*\*\* $P <$  0.001; \*\*\*\* $P <$  0.0001 (two-tailed Student's  $t$  test). **B.** Correlation between the fitness  
448 cost (y axis) and the SOS induction (x axis) representing all the data points from A. The blue line represents the  
449 logarithmic regression line, and the grey area represents the 95% confidence interval. **C.** SOS induction (blue  
450 bars) and fitness cost (red bars) of sensitive bacteria and Erm<sup>R</sup> mutants in LB broth at 4 hours. The dashed line  
451 indicates no SOS induction. Error bars represent mean  $\pm$  standard deviation of independent biological replicates  
452 ( $n=6$ ). N.S. non-significant; \* $P <$  0.05; \*\* $P <$  0.01; \*\*\* $P <$  0.001; \*\*\*\* $P <$  0.0001 (two-tailed Student's  $t$  test).

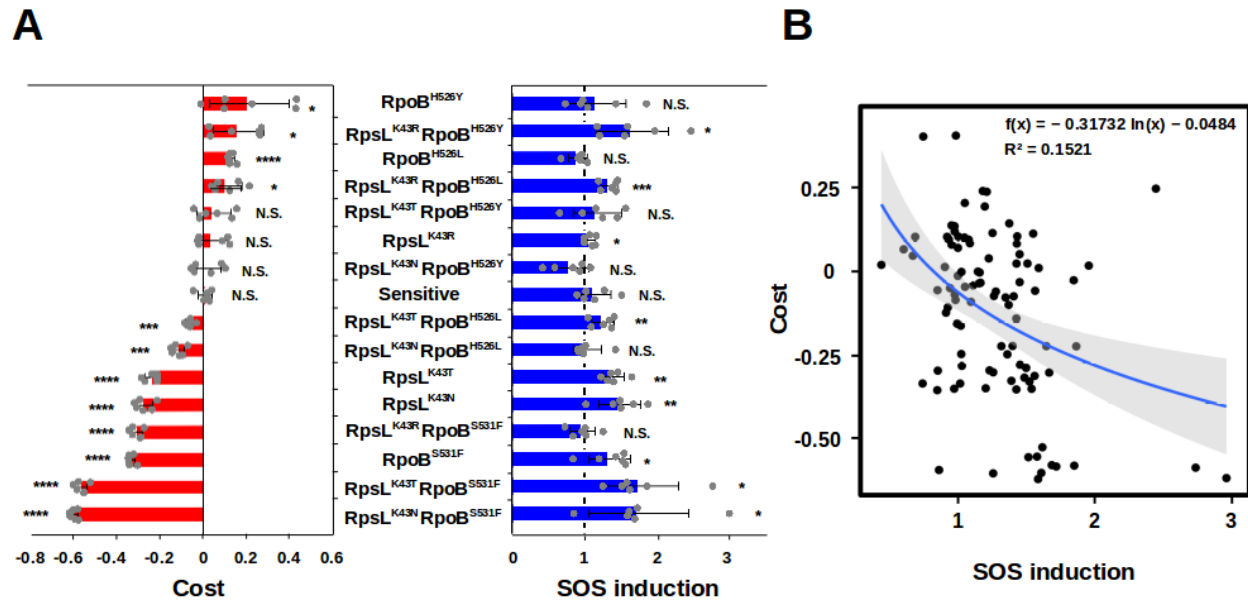

453 **Figure 2. DNA breaks are reduced in minimal medium.** **A.** Fitness cost (red bars), and SOS induction (blue  
 454 bars) of sensitive bacteria and Str<sup>R</sup> and/or Rif<sup>R</sup> mutants in minimal medium at 8 hours. The strains are ordered  
 455 from lower to higher cost (top to bottom). The dashed line indicates no SOS induction. Error bars represent  
 456 mean  $\pm$  standard deviation of independent biological replicates (n=6). N.S. non-significant; \* $P < 0.05$ ; \*\* $P <$   
 457  $0.01$ ; \*\*\* $P < 0.001$ ; \*\*\*\* $P < 0.0001$  (two-tailed Student's  $t$  test). **B.** Correlation between the fitness cost (y axis)  
 458 and the SOS induction (x axis) representing all the data points from panel A. The blue line represents the  
 459 logarithmic regression line, and the grey area represents the 95% confidence interval.



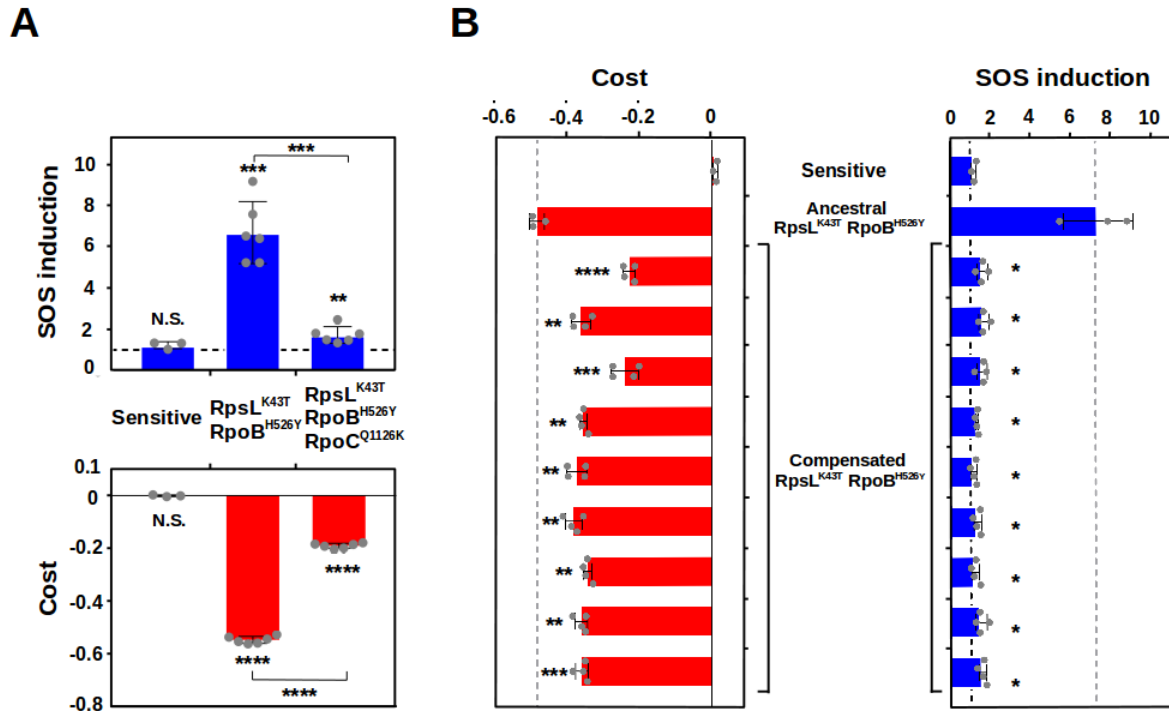

460 **Figure 3. Compensatory evolution cause reduction of DNA breaks.** **A.** SOS induction (blue bars) and fitness  
 461 cost (red bars), of sensitive (left) double resistant (center) and double resistant carrying a compensatory mutation  
 462 (right) bacteria in LB broth at 4 hours. The dashed line indicates no SOS induction. Error bars represent mean  $\pm$   
 463 standard deviation of independent biological replicates ( $n \geq 3$ ). N.S. non-significant; \* $P < 0.05$ ; \*\* $P < 0.01$ ; \*\*\* $P$   
 464  $< 0.001$ ; \*\*\*\* $P < 0.0001$  (two-tailed Student's  $t$  test). **B.** Fitness cost (red bars), and SOS induction (blue bars)  
 465 of sensitive, ancestral RpsL<sup>K43T</sup> RpoB<sup>H526Y</sup> and nine compensated RpsL<sup>K43T</sup> RpoB<sup>H526Y</sup> clones in LB broth at 4  
 466 hours. The black dashed line indicates no SOS induction. The grey dashed lines mark the cost/SOS of the  
 467 ancestral double mutant. Error bars represent mean  $\pm$  standard deviation of independent biological replicates  
 468 ( $n \geq 3$ ). N.S. non-significant; \* $P < 0.05$ ; \*\* $P < 0.01$ ; \*\*\* $P < 0.001$ ; \*\*\*\* $P < 0.0001$  (two-tailed Student's  $t$  test).

469

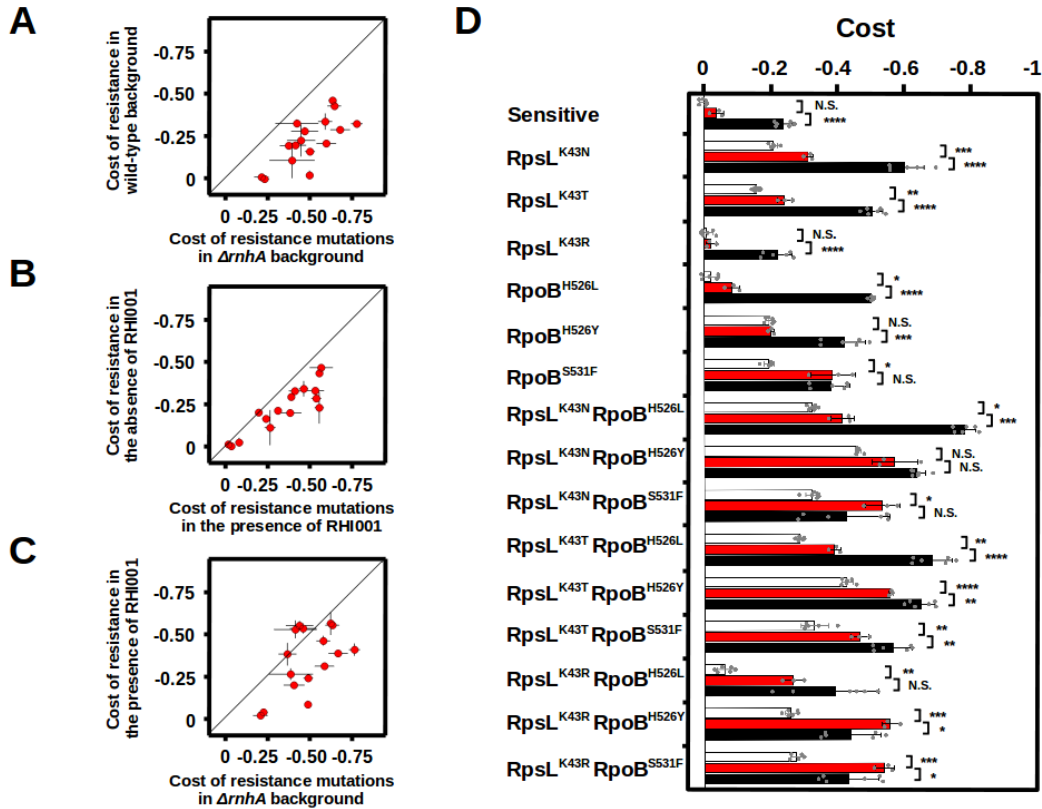

470 **Figure 4. RNase HI strongly influences the fitness of resistant bacteria.** **A.** Correlation between the fitness  
 471 cost of resistance mutations in wild-type (y axis) or  $\Delta rnhA$  backgrounds (x axis). **B.** Correlation between the  
 472 fitness cost of resistance mutations in the absence of the RNase HI inhibitor (y axis) or in its presence (x axis).  
 473 **C.** Correlation between the fitness cost of resistance mutations in the presence of the RHI001 (y axis) or in the  
 474  $\Delta rnhA$  background (x axis). The values corresponding to the wild-type background in panel A and to absence of  
 475 RHI001 in panel B are those shown in Figure 1A. Error bars represent mean  $\pm$  standard deviation of independent  
 476 biological replicates (n $\geq$ 3). The black line in panels A-C represents the linear regression if the costs were  
 477 identical **D.** Fitness cost of sensitive bacteria and  $Str^R$  and/or  $Rif^R$  mutants in the presence of the RNase HI  
 478 inhibitor RHI001 (red bars). For comparison, the corresponding values in the absence of the inhibitor (data from  
 479 the experiments shown in Figure 1A) or in a  $\Delta rnhA$  background (data from the experiments shown in panel A  
 480 and Figure S3A) are represented as white and black bars, respectively. Error bars represent mean  $\pm$  standard  
 481 deviation of independent biological replicates (n=3). N.S. non-significant; \* $P < 0.05$ ; \*\* $P < 0.01$ ; \*\*\* $P < 0.001$ ;  
 482 \*\*\*\* $P < 0.0001$  (two-tailed Student's  $t$  test). See also Figures S3, S4 and S5.

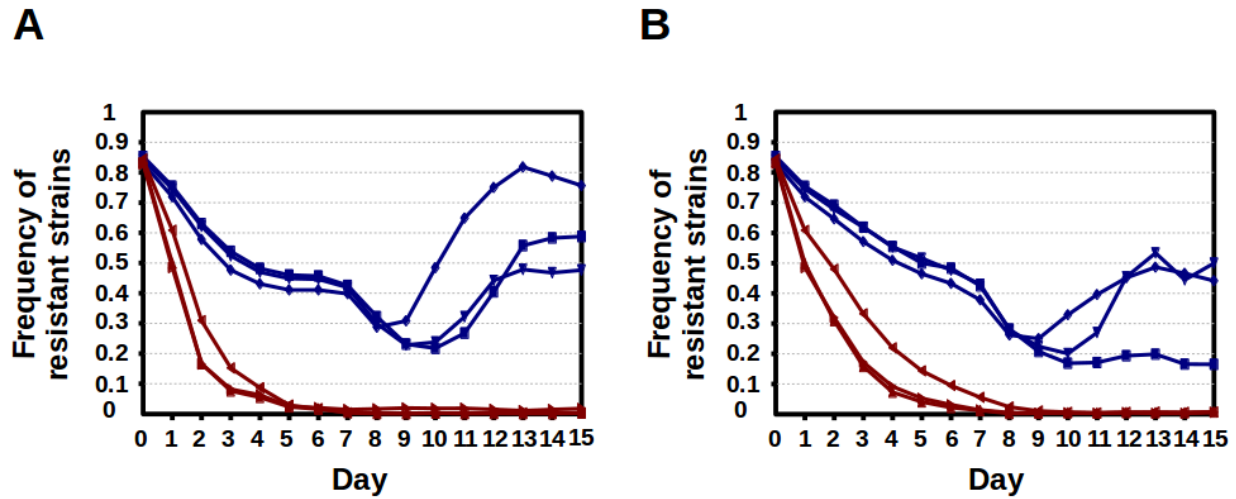

483 **Figure 5. Lack of RNase HI favors outcompetition of resistant mutants by sensitive bacteria.** Frequency of  
484 single resistant mutants during three independent long-term competitions against sensitive bacteria either in a  
485 genetic background including RNase HI (blue lines) or in a  $\Delta rnhA$  background (red lines), imposing either a  
486 strong (1:1500 dilutions) (A) or a mild (1:50 dilutions) (B) bottlenecks.

487 **Tables**

488

489 **Table 1. Percentage of cells showing DNA breaks (Gam-GFP foci) in sensitive and resistant bacteria either**  
490 **in wild-type or  $\Delta rnhA$  backgrounds.** Except in the  $\Delta dam$  positive control (in which over 100 cells sufficed to  
491 provide an illustrative example), at least 1000 cells per group were analyzed. See also Figures S1 and S2.

492

|                                                                        |               |
|------------------------------------------------------------------------|---------------|
| <b><math>\Delta dam</math> (positive control)</b>                      | <b>21.28%</b> |
| <b>Sensitive</b>                                                       | <b>0.72%</b>  |
| <b><i>rpsL</i> (K43N)</b>                                              | <b>0.73%</b>  |
| <b><i>rpoB</i> (H526Y)</b>                                             | <b>0.96%</b>  |
| <b><i>rpsL</i> (K43N) <i>rpoB</i> (H526Y)</b>                          | <b>10.71%</b> |
| <b><math>\Delta rnhA</math> (sensitive)</b>                            | <b>9.27%</b>  |
| <b><math>\Delta rnhA</math> <i>rpsL</i> (K43N)</b>                     | <b>33.92%</b> |
| <b><math>\Delta rnhA</math> <i>rpoB</i> (H526Y)</b>                    | <b>10.02%</b> |
| <b><math>\Delta rnhA</math> <i>rpsL</i> (K43N) <i>rpoB</i> (H526Y)</b> | <b>49.90%</b> |

493

494 **Supplemental Figures**

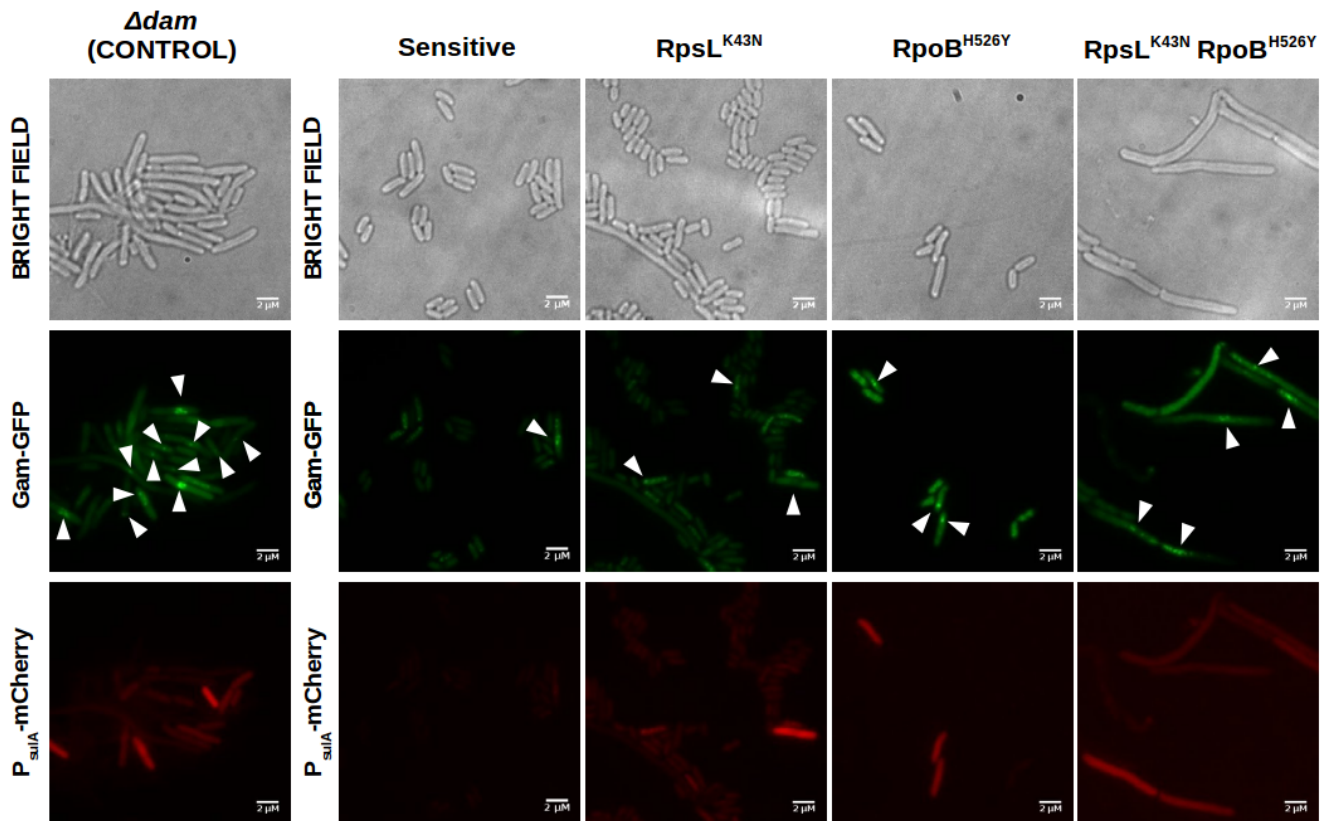

495 **Figure S1. Visualization of DNA breaks and SOS induction of sensitive, single and double resistant strains**  
496 **by epifluorescence microscopy.** Bacterial cells show a disperse faint green fluorescence distributed along the  
497 cytoplasm, unless DNA breaks are present; upon generation of DNA breaks, the disperse fluorescence  
498 concentrates in bright fluorescent foci (central panels, false-colored in green). Red fluorescence (bottom panels,  
499 false-colored in red) is absent until the SOS response is induced due to the presence of DNA breaks. Cell  
500 elongation (top panels) is a well-known phenotype derived from the inhibition of cell division by SOS-regulated  
501 proteins.

## *ΔrnhA*

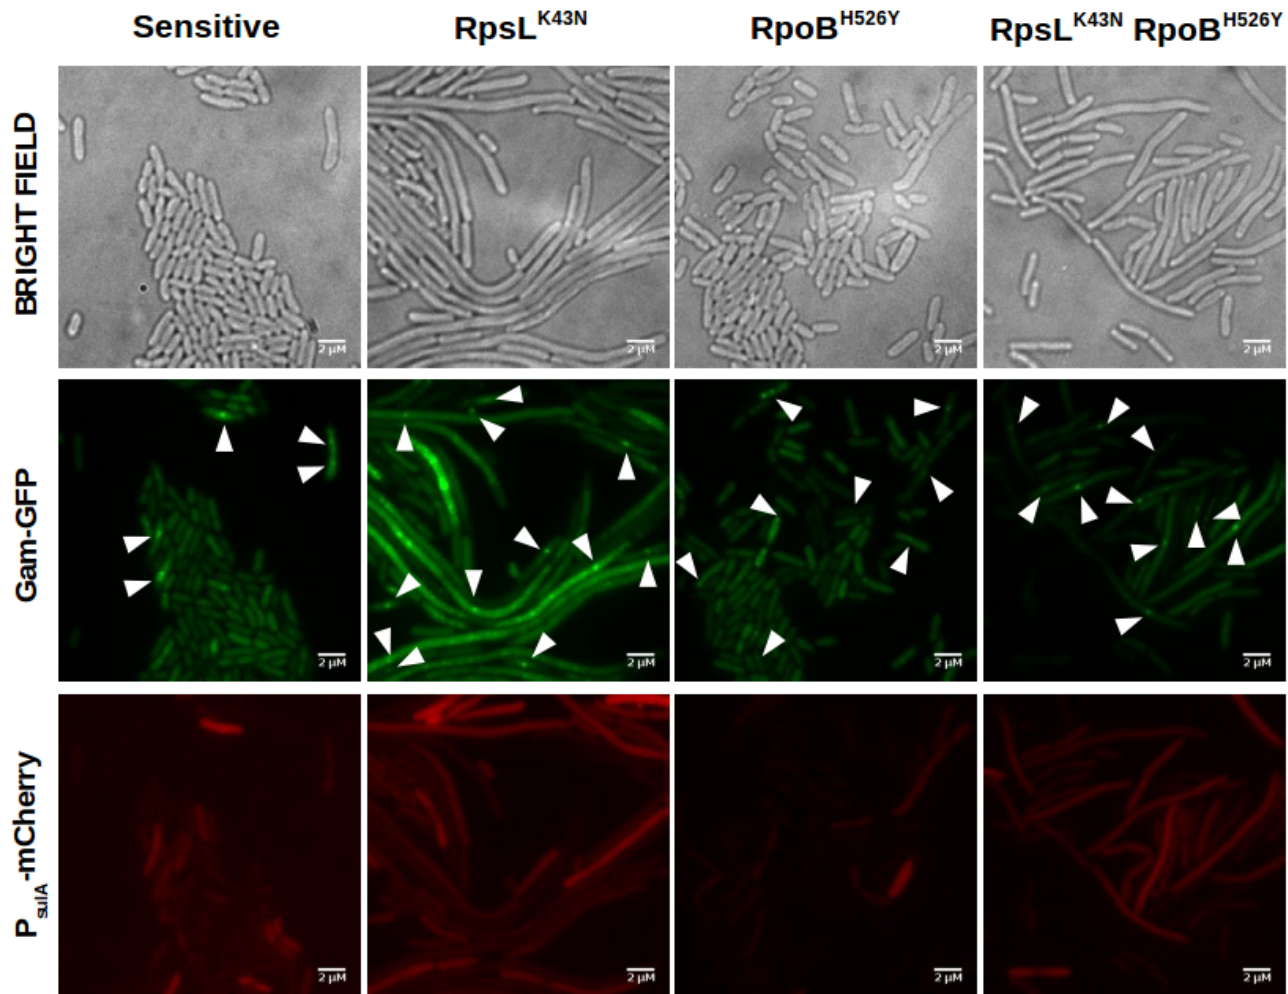

502 **Figure S2. Visualization of DNA breaks and SOS induction of sensitive, single and double resistant strains**  
503 **in *ΔrnhA* background by epifluorescence microscopy.** Bacterial cells show a disperse faint green fluorescence  
504 distributed along the cytoplasm, unless DNA breaks are present; upon generation of DNA breaks, the disperse  
505 fluorescence concentrates in bright fluorescent foci (central panels, false-colored in green). Red fluorescence  
506 (bottom panels, false-colored in red) is absent until the SOS response is induced due to the presence of DNA  
507 breaks. Cell elongation (top panels) is a well known phenotype derived from the inhibition of cell division by  
508 SOS-regulated proteins.

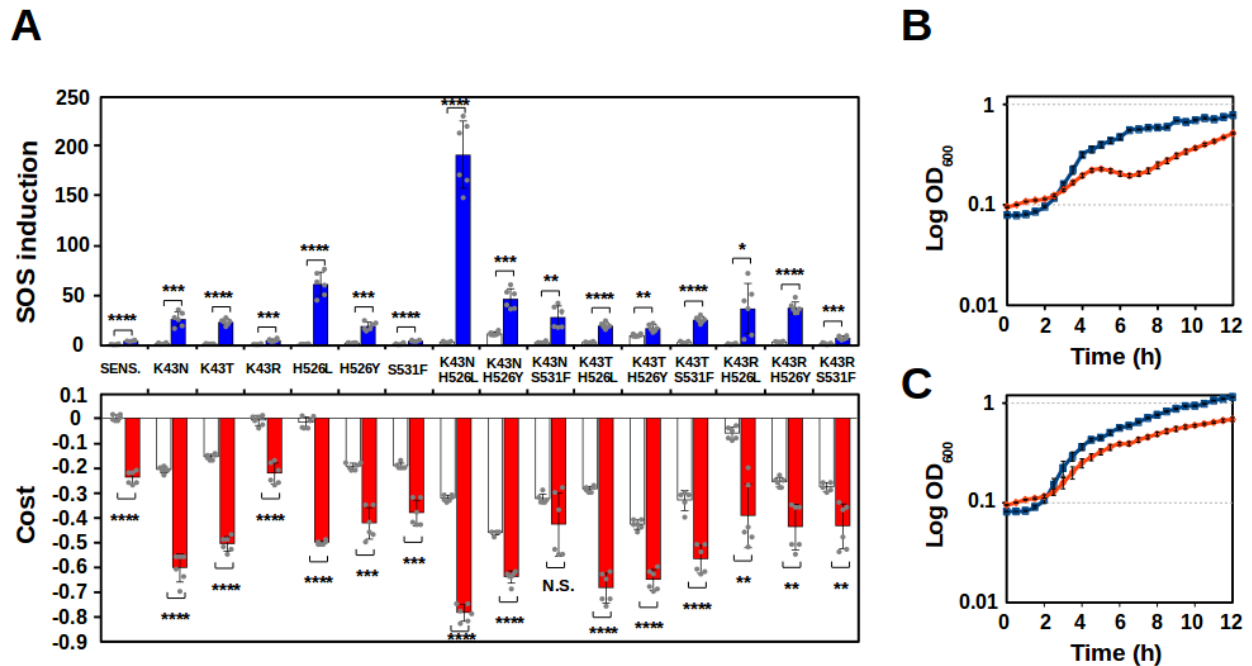

509 **Figure S3. Depletion of RNase HI increases fitness cost and SOS induction.** **A.** SOS induction (blue bars)  
 510 and fitness cost (red bars), of sensitive bacteria and Str<sup>R</sup> and/or Rif<sup>R</sup> mutants (labels represent the corresponding  
 511 allele/s) in a *Arnha* background. The white bars represent the corresponding values in bacteria with an intact  
 512 *rnhA* gene (data from the experiments shown in Figure 1A), for comparison. Error bars represent mean  $\pm$   
 513 standard deviation of independent biological replicates (n=6). N.S. non-significant; \* $P < 0.05$ ; \*\* $P < 0.01$ ; \*\*\* $P$   
 514  $< 0.001$ ; \*\*\*\* $P < 0.0001$  (two-tailed Student's *t* test). **B.** Growth curves of RpsL<sup>K43N</sup> RpoB<sup>H526Y</sup> double mutant in  
 515 the presence of either DMSO (blue lines) or RHI001 (orange lines). Points and error bars represent mean  $\pm$   
 516 standard deviation of independent biological replicates (n=3). **C.** Growth curves of sensitive bacteria in the  
 517 presence of either DMSO (blue lines) or RHI001 (orange lines). Points and error bars represent mean  $\pm$  standard  
 518 deviation of independent biological replicates (n=3).



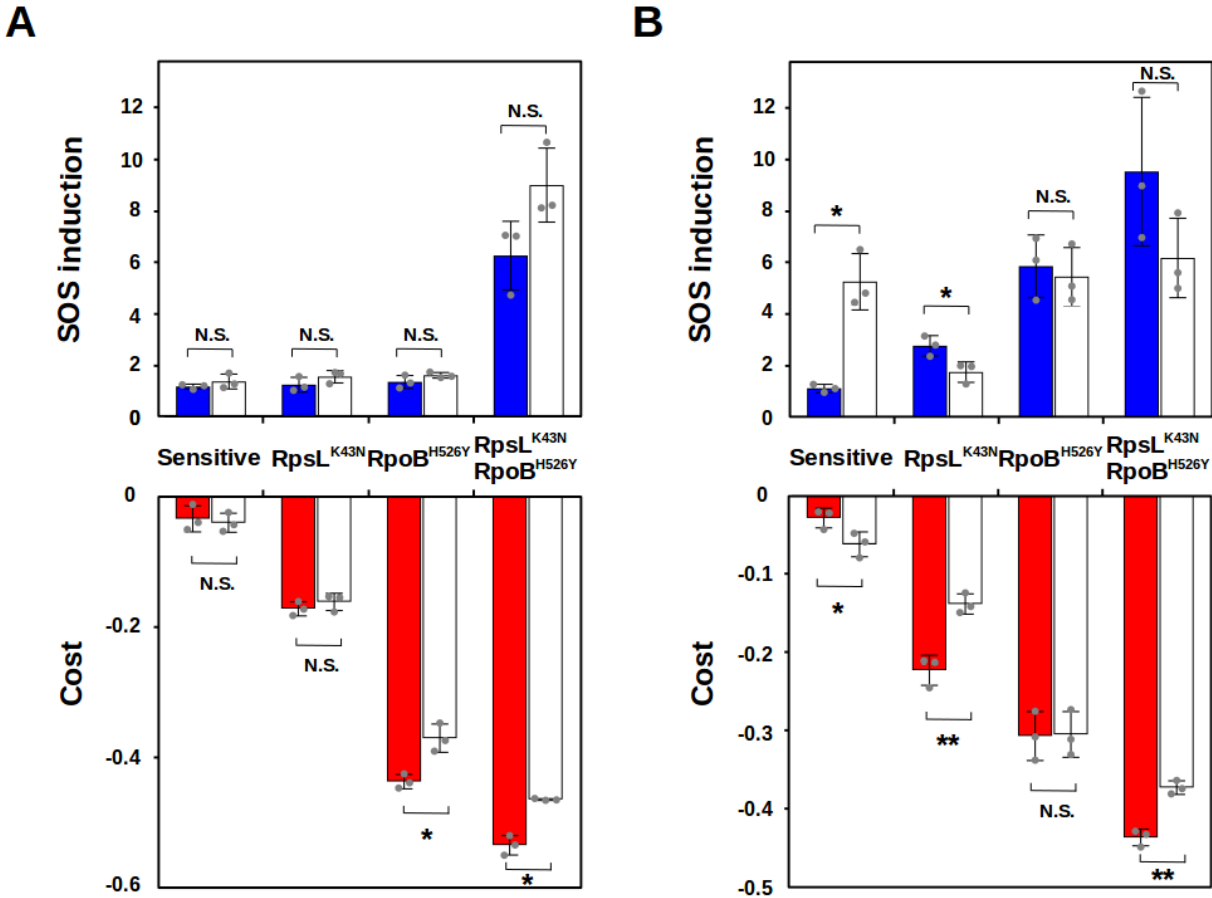

519 **Figure S4. Mild overproduction of RNase HI can ameliorate both cost and SOS induction.** SOS induction  
 520 (top) and fitness cost (bottom), of sensitive bacteria (left), two single resistant mutants (center) and the double  
 521 mutant combining these two alleles (right) in LB broth at 4h (A) or 24h (B) in a background harboring an  
 522 additional chromosomal copy of the gene encoding the RNase HI (*rnhA*) under the control of the arabinose  
 523 promoter, either in the absence (red bars) or the presence (white bars) of arabinose. Error bars represent mean ±  
 524 standard deviation of independent biological replicates (n=3). N.S. non-significant; \* $P < 0.05$ ; \*\* $P < 0.01$ ; \*\*\* $P$   
 525  $< 0.001$ ; \*\*\*\* $P < 0.0001$  (two-tailed Student's *t* test).

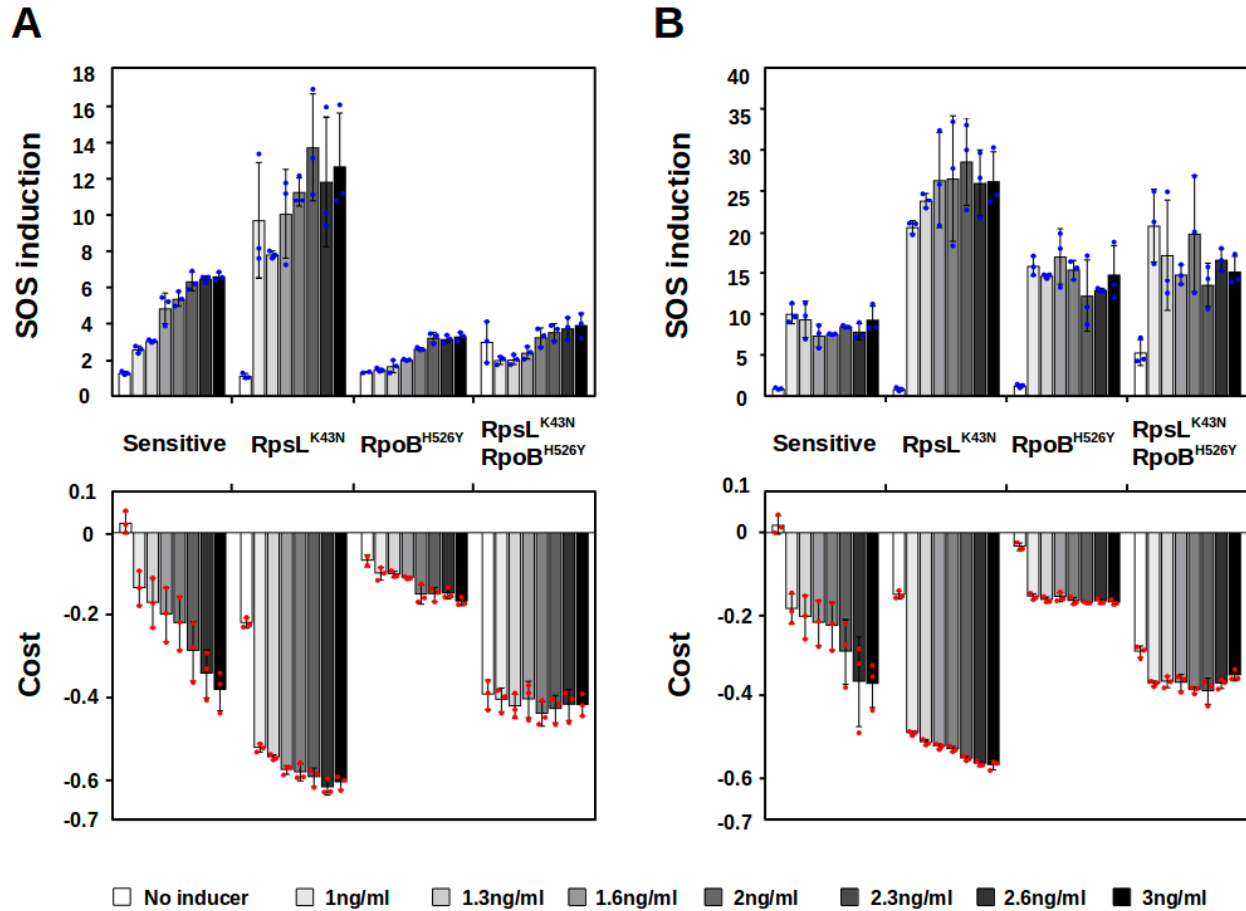

526 **Figure S5. Strong overproduction of RNase HI increases cost and SOS induction in all the backgrounds.**  
527 SOS induction (top) and fitness cost (bottom), of sensitive bacteria (left), two single resistant mutants (center)  
528 and the double mutant combining these two alleles (right) in LB broth at 4h (A) or 24h (B) in a background  
529 harboring a plasmid carrying a copy of the RNase HI gene (*rnhA*) under the control of a promoter inducible by  
530 anhydrotetracycline, either in the absence (white bars) or the presence of different concentrations of the inducer  
531 (greyscale, from light grey to black bars). Error bars represent mean  $\pm$  standard deviation of independent  
532 biological replicates ( $n \geq 2$ ). N.S. non-significant; \* $P < 0.05$ ; \*\* $P < 0.01$ ; \*\*\* $P < 0.001$ ; \*\*\*\* $P < 0.0001$  (two-  
533 tailed Student's *t* test).

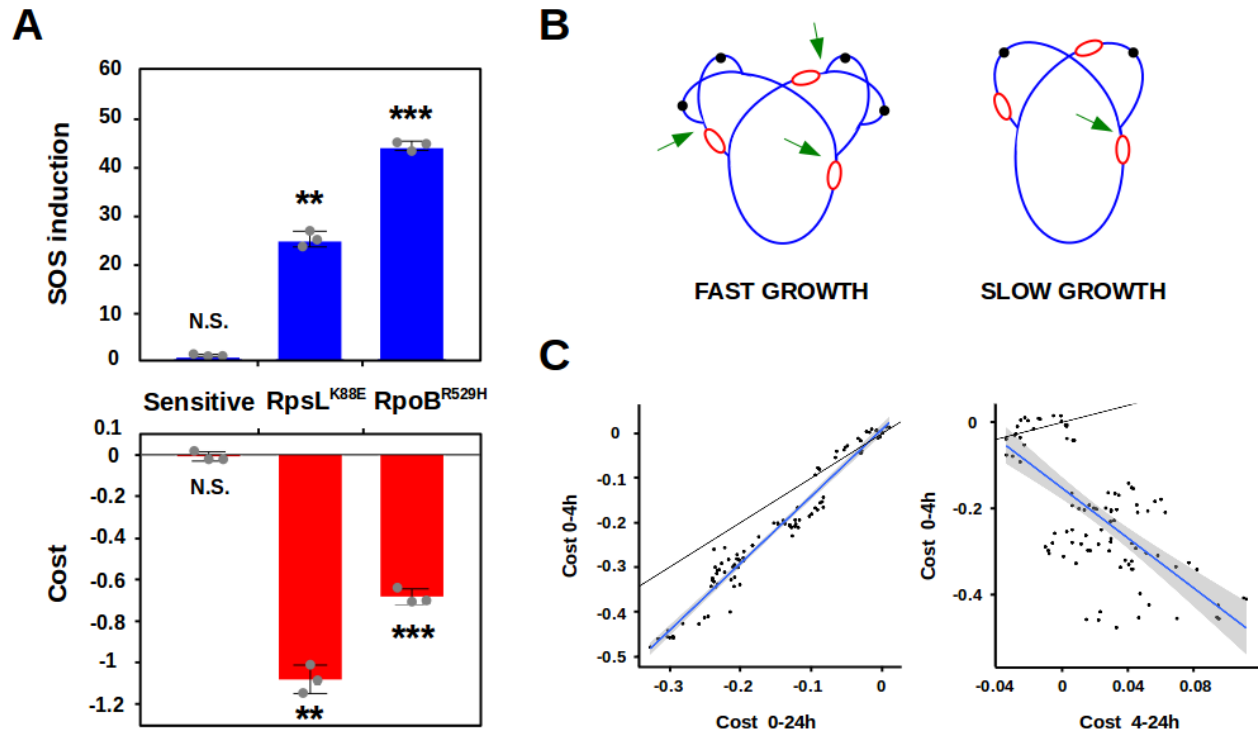

534 **Figure S6. A. Costly single mutants show increased SOS induction.** SOS induction (blue bars) and fitness  
 535 cost (red bars), of sensitive bacteria (left) and two costly single resistant mutants (center and right). Error bars  
 536 represent mean  $\pm$  standard deviation of independent biological replicates ( $n=3$ ). N.S. non-significant;  $*P < 0.05$ ;  
 537  $**P < 0.01$ ;  $***P < 0.001$ ;  $****P < 0.0001$  (two-tailed Student's  $t$  test). **B. Schematic representation of multi-  
 538 fork DNA replication of *E. coli* during fast (left) or slow (right) growth.** Black dots represent the origin of  
 539 replication, and red lines represent transcription forks; green arrows mark regions of potential conflicts between  
 540 replication and transcription forks. **C. Costs are expressed during fast growth.** Data from the experiments  
 541 shown in Figure 1A. Left panel: correlation between the fitness cost between time 0 and 4h (y axis) and between  
 542 time 0 and 24h (y axis), in LB broth. Right panel: correlation between the fitness cost between time 0 and 4h (y  
 543 axis) and between time 4h and 24h (y axis), in LB broth. Black lines represent the linear regressions if the costs  
 544 were identical. Blue lines represent the regression lines, and the grey areas represent the 95% confidence  
 545 intervals.

546 **References**

547

- Almeida Da Silva, P. E. A., & Palomino, J. C. (2011). Molecular basis and mechanisms of drug resistance in *Mycobacterium tuberculosis*: Classical and new drugs. *The Journal of Antimicrobial Chemotherapy*, 66(7), 1417–1430. <https://doi.org/10.1093/jac/dkr173>
- Andersson, D. I., & Levin, B. R. (1999). The biological cost of antibiotic resistance. *Current Opinion in Microbiology*, 2(5), 489–493.
- Andersson, Dan I., & Hughes, D. (2010). Antibiotic resistance and its cost: Is it possible to reverse resistance? *Nature Reviews. Microbiology*, 8(4), 260–271. <https://doi.org/10.1038/nrmicro2319>
- Applebee, M. K., Herrgård, M. J., & Pálsson, B. Ø. (2008). Impact of individual mutations on increased fitness in adaptively evolved strains of *Escherichia coli*. *Journal of Bacteriology*, 190(14), 5087–5094. <https://doi.org/10.1128/JB.01976-07>
- Balbontín, R., Vlamakis, H., & Kolter, R. (2014). Mutualistic interaction between *Salmonella enterica* and *Aspergillus niger* and its effects on *Zea mays* colonization. *Microbial Biotechnology*, 7(6), 589–600. <https://doi.org/10.1111/1751-7915.12182>
- Bertani, G. (1951). Studies on lysogenesis. I. The mode of phage liberation by lysogenic *Escherichia coli*. *Journal of Bacteriology*, 62(3), 293–300.
- Birge, E. A., & Kurland, C. G. (1969). Altered ribosomal protein in streptomycin-dependent *Escherichia coli*. *Science (New York, N.Y.)*, 166(3910), 1282–1284. <https://doi.org/10.1126/science.166.3910.1282>
- Blattner, F. R., Plunkett, G., Bloch, C. A., Perna, N. T., Burland, V., Riley, M., ... Shao, Y. (1997). The complete genome sequence of *Escherichia coli* K-12. *Science (New York, N.Y.)*, 277(5331), 1453–1462. <https://doi.org/10.1126/science.277.5331.1453>

- Bohman, K., Ruusala, T., Jelenc, P. C., & Kurland, C. G. (1984). Kinetic impairment of restrictive streptomycin-resistant ribosomes. *Molecular & General Genetics: MGG*, 198(2), 90–99. <https://doi.org/10.1007/bf00328706>
- Broccoli, S., Rallu, F., Sanscartier, P., Cerritelli, S. M., Crouch, R. J., & Drolet, M. (2004). Effects of RNA polymerase modifications on transcription-induced negative supercoiling and associated R-loop formation. *Molecular Microbiology*, 52(6), 1769–1779. <https://doi.org/10.1111/j.1365-2958.2004.04092.x>
- Burmann, B. M., Schweimer, K., Luo, X., Wahl, M. C., Stitt, B. L., Gottesman, M. E., & Rösch, P. (2010). A NusE:NusG complex links transcription and translation. *Science (New York, N.Y.)*, 328(5977), 501–504. <https://doi.org/10.1126/science.1184953>
- Chittum, H. S., & Champney, W. S. (1994). Ribosomal protein gene sequence changes in erythromycin-resistant mutants of *Escherichia coli*. *Journal of Bacteriology*, 176(20), 6192–6198. <https://doi.org/10.1128/jb.176.20.6192-6198.1994>
- Das, A., Merrill, C., & Adhya, S. (1978). Interaction of RNA polymerase and rho in transcription termination: Coupled ATPase. *Proceedings of the National Academy of Sciences of the United States of America*, 75(10), 4828–4832. <https://doi.org/10.1073/pnas.75.10.4828>
- Datsenko, K. A., & Wanner, B. L. (2000). One-step inactivation of chromosomal genes in *Escherichia coli* K-12 using PCR products. *Proceedings of the National Academy of Sciences of the United States of America*, 97(12), 6640–6645. <https://doi.org/10.1073/pnas.120163297>
- Dong, H., & Kurland, C. G. (1995). Ribosome mutants with altered accuracy translate with reduced processivity. *Journal of Molecular Biology*, 248(3), 551–561. <https://doi.org/10.1006/jmbi.1995.0242>

- Durão, P., Balbontín, R., & Gordo, I. (2018). Evolutionary Mechanisms Shaping the Maintenance of Antibiotic Resistance. *Trends in Microbiology*, 26(8), 677–691. <https://doi.org/10.1016/j.tim.2018.01.005>
- Durão, P., Trindade, S., Sousa, A., & Gordo, I. (2015). Multiple Resistance at No Cost: Rifampicin and Streptomycin a Dangerous Liaison in the Spread of Antibiotic Resistance. *Molecular Biology and Evolution*, 32(10), 2675–2680. <https://doi.org/10.1093/molbev/msv143>
- Dutta, D., Shatalin, K., Epshtein, V., Gottesman, M. E., & Nudler, E. (2011). Linking RNA polymerase backtracking to genome instability in *E. coli*. *Cell*, 146(4), 533–543. <https://doi.org/10.1016/j.cell.2011.07.034>
- Figuroa-Bossi, N., & Bossi, L. (2015). Recombineering applications for the mutational analysis of bacterial RNA-binding proteins and their sites of action. *Methods in Molecular Biology (Clifton, N.J.)*, 1259, 103–116. [https://doi.org/10.1007/978-1-4939-2214-7\\_7](https://doi.org/10.1007/978-1-4939-2214-7_7)
- Fisher, R. F., & Yanofsky, C. (1983). Mutations of the beta subunit of RNA polymerase alter both transcription pausing and transcription termination in the *trp* operon leader region in vitro. *The Journal of Biological Chemistry*, 258(13), 8146–8150.
- Galas, D. J., & Branscomb, E. W. (1976). Ribosome slowed by mutation to streptomycin resistance. *Nature*, 262(5569), 617–619. <https://doi.org/10.1038/262617b0>
- Gartner, T. K., & Orias, E. (1966). Effects of mutations to streptomycin resistance on the rate of translation of mutant genetic information. *Journal of Bacteriology*, 91(3), 1021–1028.
- Global antimicrobial resistance surveillance system (GLASS) report: Early implementation 2017-2018. Geneva: World Health Organization. 2018. (n.d).*
- Gorini, L., & Kataja, E. (1964). STREPTOMYCIN-INDUCED OVERSUPPRESSION IN *E. COLI*. *Proceedings of the National Academy of Sciences of the United States of America*, 51, 995–1001. <https://doi.org/10.1073/pnas.51.6.995>

- Gowrishankar, J., & Pittard, J. (1982). Regulation of phenylalanine biosynthesis in *Escherichia coli* K-12: Control of transcription of the *pheA* operon. *Journal of Bacteriology*, *150*(3), 1130–1137.
- Guarente, L. P., & Beckwith, J. (1978). Mutant RNA polymerase of *Escherichia coli* terminates transcription in strains making defective rho factor. *Proceedings of the National Academy of Sciences of the United States of America*, *75*(1), 294–297. <https://doi.org/10.1073/pnas.75.1.294>
- Gupta, R., Chatterjee, D., Glickman, M. S., & Shuman, S. (2017). Division of labor among *Mycobacterium smegmatis* RNase H enzymes: RNase H1 activity of RnhA or RnhC is essential for growth whereas RnhB and RnhA guard against killing by hydrogen peroxide in stationary phase. *Nucleic Acids Research*, *45*(1), 1–14. <https://doi.org/10.1093/nar/gkw1046>
- Hall, A. R. (2013). Genotype-by-environment interactions due to antibiotic resistance and adaptation in *Escherichia coli*. *Journal of Evolutionary Biology*, *26*(8), 1655–1664. <https://doi.org/10.1111/jeb.12172>
- Hall, Alex R., Iles, J. C., & MacLean, R. C. (2011). The fitness cost of rifampicin resistance in *Pseudomonas aeruginosa* depends on demand for RNA polymerase. *Genetics*, *187*(3), 817–822. <https://doi.org/10.1534/genetics.110.124628>
- Hammer, K., Jensen, K. F., Poulsen, P., Oppenheim, A. B., & Gottesman, M. (1987). Isolation of *Escherichia coli* *rpoB* mutants resistant to killing by lambda cII protein and altered in *pyrE* gene attenuation. *Journal of Bacteriology*, *169*(11), 5289–5297. <https://doi.org/10.1128/jb.169.11.5289-5297.1987>
- Herbert, K. M., Zhou, J., Mooney, R. A., Porta, A. L., Landick, R., & Block, S. M. (2010). *E. coli* NusG inhibits backtracking and accelerates pause-free transcription by promoting forward translocation of RNA polymerase. *Journal of Molecular Biology*, *399*(1), 17–30. <https://doi.org/10.1016/j.jmb.2010.03.051>

- Hershberg, R. (2017). Antibiotic-Independent Adaptive Effects of Antibiotic Resistance Mutations. *Trends in Genetics: TIG*, 33(8), 521–528. <https://doi.org/10.1016/j.tig.2017.05.003>
- Hosaka, T., Tamehiro, N., Chumpolkulwong, N., Hori-Takemoto, C., Shirouzu, M., Yokoyama, S., & Ochi, K. (2004). The novel mutation K87E in ribosomal protein S12 enhances protein synthesis activity during the late growth phase in *Escherichia coli*. *Molecular Genetics and Genomics: MGG*, 271(3), 317–324. <https://doi.org/10.1007/s00438-004-0982-z>
- Jin, D. J., Cashel, M., Friedman, D. I., Nakamura, Y., Walter, W. A., & Gross, C. A. (1988). Effects of rifampicin resistant *rpoB* mutations on antitermination and interaction with *nusA* in *Escherichia coli*. *Journal of Molecular Biology*, 204(2), 247–261. [https://doi.org/10.1016/0022-2836\(88\)90573-6](https://doi.org/10.1016/0022-2836(88)90573-6)
- Jin, D. J., & Gross, C. A. (1989). Characterization of the pleiotropic phenotypes of rifampin-resistant *rpoB* mutants of *Escherichia coli*. *Journal of Bacteriology*, 171(9), 5229–5231. <https://doi.org/10.1128/jb.171.9.5229-5231.1989>
- Jin, D. J., & Gross, C. A. (1991). RpoB8, a rifampicin-resistant termination-proficient RNA polymerase, has an increased  $K_m$  for purine nucleotides during transcription elongation. *The Journal of Biological Chemistry*, 266(22), 14478–14485.
- Jin, D. J., Walter, W. A., & Gross, C. A. (1988). Characterization of the termination phenotypes of rifampicin-resistant mutants. *Journal of Molecular Biology*, 202(2), 245–253. [https://doi.org/10.1016/0022-2836\(88\)90455-x](https://doi.org/10.1016/0022-2836(88)90455-x)
- Jin, D. J., & Zhou, Y. N. (1996). Mutational analysis of structure-function relationship of RNA polymerase in *Escherichia coli*. *Methods in Enzymology*, 273, 300–319. [https://doi.org/10.1016/s0076-6879\(96\)73027-6](https://doi.org/10.1016/s0076-6879(96)73027-6)



- Katz, S., & Hershberg, R. (2013). Elevated mutagenesis does not explain the increased frequency of antibiotic resistant mutants in starved aging colonies. *PLoS Genetics*, 9(11), e1003968. <https://doi.org/10.1371/journal.pgen.1003968>
- Kim, J., Yoon, J., Ju, M., Lee, Y., Kim, T.-H., Kim, J., ... Han, S.-J. (2013). Identification of two HIV inhibitors that also inhibit human RNaseH2. *Molecules and Cells*, 36(3), 212–218. <https://doi.org/10.1007/s10059-013-2348-z>
- Kogoma, T. (1997). Stable DNA replication: Interplay between DNA replication, homologous recombination, and transcription. *Microbiology and Molecular Biology Reviews: MMBR*, 61(2), 212–238.
- Kohler, R., Mooney, R. A., Mills, D. J., Landick, R., & Cramer, P. (2017). Architecture of a transcribing-translating expressome. *Science (New York, N.Y.)*, 356(6334), 194–197. <https://doi.org/10.1126/science.aal3059>
- Lang, K. S., Hall, A. N., Merrikkh, C. N., Ragheb, M., Tabakh, H., Pollock, A. J., ... Merrikkh, H. (2017). Replication-Transcription Conflicts Generate R-Loops that Orchestrate Bacterial Stress Survival and Pathogenesis. *Cell*, 170(4), 787-799.e18. <https://doi.org/10.1016/j.cell.2017.07.044>
- Lennox, E. S. (1955). Transduction of linked genetic characters of the host by bacteriophage P1. *Virology*, 1(2), 190–206. [https://doi.org/10.1016/0042-6822\(55\)90016-7](https://doi.org/10.1016/0042-6822(55)90016-7)
- Li, X.-T., Thomason, L. C., Sawitzke, J. A., Costantino, N., & Court, D. L. (2013). Positive and negative selection using the tetA-sacB cassette: Recombineering and P1 transduction in *Escherichia coli*. *Nucleic Acids Research*, 41(22), e204. <https://doi.org/10.1093/nar/gkt1075>

- Lin, L. L., & Little, J. W. (1988). Isolation and characterization of noncleavable (Ind-) mutants of the LexA repressor of *Escherichia coli* K-12. *Journal of Bacteriology*, *170*(5), 2163–2173. <https://doi.org/10.1128/jb.170.5.2163-2173.1988>
- Maniatis et al. *Molecular cloning: A laboratory manual* (CSHL Press). (n.d.).
- Maslowska, K. H., Makiela-Dzbenska, K., & Fijalkowska, I. J. (2019). The SOS system: A complex and tightly regulated response to DNA damage. *Environmental and Molecular Mutagenesis*, *60*(4), 368–384. <https://doi.org/10.1002/em.22267>
- McMahon, G., & Landau, J. V. (1982). Effect of S12 ribosomal mutations on peptide chain elongation in *Escherichia coli*: A hydrostatic pressure study. *Journal of Bacteriology*, *151*(1), 516–520.
- Merrikh, H., Machón, C., Grainger, W. H., Grossman, A. D., & Sultanas, P. (2011). Co-directional replication-transcription conflicts lead to replication restart. *Nature*, *470*(7335), 554–557. <https://doi.org/10.1038/nature09758>
- Merrikh, H., Zhang, Y., Grossman, A. D., & Wang, J. D. (2012). Replication-transcription conflicts in bacteria. *Nature Reviews. Microbiology*, *10*(7), 449–458. <https://doi.org/10.1038/nrmicro2800>
- Minias, A. E., Brzostek, A. M., Korycka-Machala, M., Dziadek, B., Minias, P., Rajagopalan, M., ... Dziadek, J. (2015). RNase HI Is Essential for Survival of *Mycobacterium smegmatis*. *PloS One*, *10*(5), e0126260. <https://doi.org/10.1371/journal.pone.0126260>
- Moura de Sousa, J., Balbontín, R., Durão, P., & Gordo, I. (2017). Multidrug-resistant bacteria compensate for the epistasis between resistances. *PLoS Biology*, *15*(4), e2001741. <https://doi.org/10.1371/journal.pbio.2001741>
- Murphy, K. C., Campellone, K. G., & Poteete, A. R. (2000). PCR-mediated gene replacement in *Escherichia coli*. *Gene*, *246*(1–2), 321–330. [https://doi.org/10.1016/s0378-1119\(00\)00071-8](https://doi.org/10.1016/s0378-1119(00)00071-8)

- Negro, V., Krin, E., Aguilar Pierlé, S., Chaze, T., Gai Gianetto, Q., Kennedy, S. P., ... Baharoglu, Z. (2019). RadD Contributes to R-Loop Avoidance in Sub-MIC Tobramycin. *MBio*, 10(4). <https://doi.org/10.1128/mBio.01173-19>
- Ochi, K., & Hosaka, T. (2013). New strategies for drug discovery: Activation of silent or weakly expressed microbial gene clusters. *Applied Microbiology and Biotechnology*, 97(1), 87–98. <https://doi.org/10.1007/s00253-012-4551-9>
- Ozaki, M., Mizushima, S., & Nomura, M. (1969). Identification and functional characterization of the protein controlled by the streptomycin-resistant locus in *E. coli*. *Nature*, 222(5191), 333–339. <https://doi.org/10.1038/222333a0>
- Paulander, W., Maisnier-Patin, S., & Andersson, D. I. (2009). The fitness cost of streptomycin resistance depends on rpsL mutation, carbon source and RpoS ( $\sigma^S$ ). *Genetics*, 183(2), 539–546, 1SI-2SI. <https://doi.org/10.1534/genetics.109.106104>
- Pelchovich, G., Nadejda, S., Dana, A., Tuller, T., Bravo, I. G., & Gophna, U. (2014). Ribosomal mutations affecting the translation of genes that use non-optimal codons. *The FEBS Journal*, 281(16), 3701–3718. <https://doi.org/10.1111/febs.12892>
- Proshkin, S., Rahmouni, A. R., Mironov, A., & Nudler, E. (2010). Cooperation between translating ribosomes and RNA polymerase in transcription elongation. *Science (New York, N.Y.)*, 328(5977), 504–508. <https://doi.org/10.1126/science.1184939>
- Qi, Q., Preston, G. M., & MacLean, R. C. (2014). Linking system-wide impacts of RNA polymerase mutations to the fitness cost of rifampin resistance in *Pseudomonas aeruginosa*. *MBio*, 5(6), e01562. <https://doi.org/10.1128/mBio.01562-14>
- Quillardet, P., Huisman, O., D’Ari, R., & Hofnung, M. (1982). SOS chromotest, a direct assay of induction of an SOS function in *Escherichia coli* K-12 to measure genotoxicity. *Proceedings of*

*the National Academy of Sciences of the United States of America*, 79(19), 5971–5975.

<https://doi.org/10.1073/pnas.79.19.5971>

Quiñones, A., Kücherer, C., Piechocki, R., & Messer, W. (1987). Reduced transcription of the *rnh* gene in *Escherichia coli* mutants expressing the SOS regulon constitutively. *Molecular & General Genetics: MGG*, 206(1), 95–100. <https://doi.org/10.1007/bf00326542>

Reynolds, M. G. (2000). Compensatory evolution in rifampin-resistant *Escherichia coli*. *Genetics*, 156(4), 1471–1481.

Ruusala, T., Andersson, D., Ehrenberg, M., & Kurland, C. G. (1984). Hyper-accurate ribosomes inhibit growth. *The EMBO Journal*, 3(11), 2575–2580.

Saxena, S., Myka, K. K., Washburn, R., Costantino, N., Court, D. L., & Gottesman, M. E. (2018). *Escherichia coli* transcription factor NusG binds to 70S ribosomes. *Molecular Microbiology*, 108(5), 495–504. <https://doi.org/10.1111/mmi.13953>

Schrag, S. J., & Perrot, V. (1996). Reducing antibiotic resistance. *Nature*, 381(6578), 120–121. <https://doi.org/10.1038/381120b0>

Sedlyarova, N., Rescheneder, P., Magán, A., Popitsch, N., Rziha, N., Bilusic, I., ... Nudler, E. (2017). Natural RNA Polymerase Aptamers Regulate Transcription in *E. coli*. *Molecular Cell*, 67(1), 30–43.e6. <https://doi.org/10.1016/j.molcel.2017.05.025>

Shee, C., Cox, B. D., Gu, F., Luengas, E. M., Joshi, M. C., Chiu, L.-Y., ... Rosenberg, S. M. (2013). Engineered proteins detect spontaneous DNA breakage in human and bacterial cells. *ELife*, 2, e01222. <https://doi.org/10.7554/eLife.01222>

Stockum, A., Lloyd, R. G., & Rudolph, C. J. (2012). On the viability of *Escherichia coli* cells lacking DNA topoisomerase I. *BMC Microbiology*, 12, 26. <https://doi.org/10.1186/1471-2180-12-26>

Subramaniam, A. R., Pan, T., & Cluzel, P. (2013). Environmental perturbations lift the degeneracy of the genetic code to regulate protein levels in bacteria. *Proceedings of the National Academy of*

*Sciences of the United States of America*, 110(6), 2419–2424.  
<https://doi.org/10.1073/pnas.1211077110>

Tadokoro, T., & Kanaya, S. (2009). Ribonuclease H: Molecular diversities, substrate binding domains, and catalytic mechanism of the prokaryotic enzymes. *The FEBS Journal*, 276(6), 1482–1493.  
<https://doi.org/10.1111/j.1742-4658.2009.06907.x>

Tramontano, E., Corona, A., & Menendez-Arias, L. (2019). Ribonuclease H, an unexploited target for antiviral intervention against HIV and hepatitis B virus. *Antiviral Research*, 104613.  
<https://doi.org/10.1016/j.antiviral.2019.104613>

Trindade, S., Sousa, A., & Gordo, I. (2012). Antibiotic resistance and stress in the light of Fisher's model. *Evolution; International Journal of Organic Evolution*, 66(12), 3815–3824.  
<https://doi.org/10.1111/j.1558-5646.2012.01722.x>

Trindade, S., Sousa, A., Xavier, K. B., Dionisio, F., Ferreira, M. G., & Gordo, I. (2009). Positive epistasis drives the acquisition of multidrug resistance. *PLoS Genetics*, 5(7), e1000578.  
<https://doi.org/10.1371/journal.pgen.1000578>

Vogwill, T., & MacLean, R. C. (2015). The genetic basis of the fitness costs of antimicrobial resistance: A meta-analysis approach. *Evolutionary Applications*, 8(3), 284–295.  
<https://doi.org/10.1111/eva.12202>

Wang, C. H., & Koch, A. L. (1978). Constancy of growth on simple and complex media. *Journal of Bacteriology*, 136(3), 969–975.

Wimberly, H., Shee, C., Thornton, P. C., Sivaramakrishnan, P., Rosenberg, S. M., & Hastings, P. J. (2013). R-loops and nicks initiate DNA breakage and genome instability in non-growing *Escherichia coli*. *Nature Communications*, 4, 2115. <https://doi.org/10.1038/ncomms3115>

Wrande, M., Roth, J. R., & Hughes, D. (2008). Accumulation of mutants in “aging” bacterial colonies is due to growth under selection, not stress-induced mutagenesis. *Proceedings of the National*

*Academy of Sciences of the United States of America*, 105(33), 11863–11868.  
<https://doi.org/10.1073/pnas.0804739105>

- Yanofsky, C., & Horn, V. (1981). Rifampin resistance mutations that alter the efficiency of transcription termination at the tryptophan operon attenuator. *Journal of Bacteriology*, 145(3), 1334–1341.
- Yu, D., Ellis, H. M., Lee, E. C., Jenkins, N. A., Copeland, N. G., & Court, D. L. (2000). An efficient recombination system for chromosome engineering in *Escherichia coli*. *Proceedings of the National Academy of Sciences of the United States of America*, 97(11), 5978–5983.  
<https://doi.org/10.1073/pnas.100127597>
- Zaman, S., Fitzpatrick, M., Lindahl, L., & Zengel, J. (2007). Novel mutations in ribosomal proteins L4 and L22 that confer erythromycin resistance in *Escherichia coli*. *Molecular Microbiology*, 66(4), 1039–1050. <https://doi.org/10.1111/j.1365-2958.2007.05975.x>
- Zhou, Y. N., & Jin, D. J. (1997). RNA polymerase beta mutations have reduced sigma70 synthesis leading to a hyper-temperature-sensitive phenotype of a sigma70 mutant. *Journal of Bacteriology*, 179(13), 4292–4298. <https://doi.org/10.1128/jb.179.13.4292-4298.1997>
- Zhou, Y. N., & Jin, D. J. (1998). The rpoB mutants destabilizing initiation complexes at stringently controlled promoters behave like “stringent” RNA polymerases in *Escherichia coli*. *Proceedings of the National Academy of Sciences of the United States of America*, 95(6), 2908–2913. <https://doi.org/10.1073/pnas.95.6.2908>
- Zhou, Yan Ning, Lubkowska, L., Hui, M., Court, C., Chen, S., Court, D. L., ... Kashlev, M. (2013). Isolation and characterization of RNA polymerase rpoB mutations that alter transcription slippage during elongation in *Escherichia coli*. *The Journal of Biological Chemistry*, 288(4), 2700–2710. <https://doi.org/10.1074/jbc.M112.429464>
